# Supplementary material
Source: PubMed Central journal article supplement (PMC4574236)
Supplement: supp_115.176743_176743SI.pdf [file supp_115.176743_176743SI.pdf]

Ying Zhang and Matthew S. Sachs

Supplemental Tables

**Table S1 Homologs of NMD, EJC, CBC factors and other components related to these pathways.**

The *N. crassa* homologs identified represent the best bidirectional hits for each organism as determined using BLASTP at the NCBI website.

Exceptions are indicated.

| Protein Name | Organism             | NCBI Reference Sequence <sup>a</sup> | Reciprocal BLAST <sup>b</sup> | Ref/Note                                       |
|--------------|----------------------|--------------------------------------|-------------------------------|------------------------------------------------|
| Upf1         | <i>N. crassa</i>     | XP_961233.1                          |                               | NCU04242                                       |
|              | <i>S. pombe</i>      | NP_593080.1                          | XP_961233.1                   | Upf1                                           |
|              | <i>S. cerevisiae</i> | NP_013797.1                          | XP_961233.1                   | NAM7                                           |
|              | <i>H. sapiens</i>    | NP_001284478.1                       | XP_961233.1                   | regulator of nonsense transcripts 1 isoform 1  |
|              | <i>C. elegans</i>    | NP_490829.1                          | XP_961233.1                   | SMG-2                                          |
| Upf2         | <i>N. crassa</i>     | XP_961757.2                          |                               | NCU05267                                       |
|              | <i>S. pombe</i>      | NP_593784.1                          | XP_961757.2                   | Upf2                                           |
|              | <i>S. cerevisiae</i> | NP_011944.2                          | XP_961757.2                   | Nmd2p                                          |
|              | <i>H. sapiens</i>    | NP_056357.1                          | XP_961757.2                   | regulator of nonsense transcripts 2            |
|              | <i>C. elegans</i>    | NP_500974.2                          | XP_961757.2                   | SMG-3                                          |
| Upf3         | <i>N. crassa</i>     | XP_956721.1                          |                               | NCU03435                                       |
|              | <i>S. cerevisiae</i> | NP_011586.1                          | XP_956721.1                   | Upf3p                                          |
|              | <i>H. sapiens</i>    | NP_075386.1                          | XP_956721.1                   | regulator of nonsense transcripts 3B isoform 2 |
|              | <i>C. elegans</i>    | (NP_741600.1)<br>c                   | XP_956721.1                   | SMG-4, isoform b                               |
| Xrn1         | <i>N. crassa</i>     | XP_960925.2                          |                               | NCU06678                                       |
|              | <i>S. pombe</i>      | NP_593482.1                          | XP_960925.2                   | exonuclease II Exo2                            |
|              | <i>S. cerevisiae</i> | NP_011342.1                          | XP_960925.2                   | Xrn1p                                          |
|              | <i>H. sapiens</i>    | NP_001269786.1                       | XP_960925.2                   | 5'-3' exoribonuclease 1 isoform c              |
|              | <i>C. elegans</i>    | NP_496945.3                          | XP_960925.2                   | XRN-1                                          |
| Y14          | <i>N. crassa</i>     | XP_965326.1                          |                               | NCU03226                                       |
|              | <i>S. pombe</i>      | NP_594439.1                          | XP_965326.1                   |                                                |
|              | <i>S. cerevisiae</i> | not detected                         |                               |                                                |
|              | <i>H. sapiens</i>    | NP_005096.1                          | XP_965326.1                   |                                                |
|              | <i>C. elegans</i>    | NP_497891.1                          | XP_965326.1                   | RNP-4                                          |
|              | <i>X. laevis</i>     | NP_001079905.1                       | XP_965326.1                   | RNA-binding protein 8A-B                       |

|                  |                        |                          |             |                                                             |
|------------------|------------------------|--------------------------|-------------|-------------------------------------------------------------|
|                  | <i>D. melanogaster</i> | NP_610454.2              | XP_965326.1 | tsunagi                                                     |
|                  | <i>A. thaliana</i>     | NP_564591.1              | XP_965326.1 |                                                             |
| Mago             | <i>N. crassa</i>       | XP_957482.1              |             | NCU04405                                                    |
|                  | <i>S. pombe</i>        | NP_596666.1              | XP_957482.1 | mago nashi                                                  |
|                  | <i>S. cerevisiae</i>   | not detected             |             |                                                             |
|                  | <i>H. sapiens</i>      | NP_060518.1              | XP_957482.1 | mago nashi                                                  |
|                  | <i>C. elegans</i>      | NP_493025.1              | XP_957482.1 | MAG-1                                                       |
|                  | <i>X. laevis</i>       | NP_00107972<br>4.1       | XP_957482.1 | mago nashi                                                  |
|                  | <i>D. melanogaster</i> | NP_476636.1              | XP_957482.1 | mago nashi                                                  |
|                  | <i>A.thaliana</i>      | NP_171716.1              | XP_957482.1 | mago nashi                                                  |
| eIF4AIII         | <i>N. crassa</i>       | XP_961600.1              |             | NCU01234                                                    |
|                  | <i>S. pombe</i>        | NP_592863.1              | XP_961600.1 |                                                             |
|                  | <i>S. cerevisiae</i>   | NP_010304.3              | XP_961600.1 | FAL1                                                        |
|                  | <i>H. sapiens</i>      | NP_055555.1              | XP_961600.1 | eIF4AIII                                                    |
|                  | <i>C. elegans</i>      | NP_490761.2              | XP_961600.1 |                                                             |
|                  | <i>X. laevis</i>       | NP_00108420<br>0.1       | XP_961600.1 | eIF4A-III-B                                                 |
|                  | <i>D. melanogaster</i> | NP_649788.2              | XP_961600.1 | eIF4AIII                                                    |
|                  | <i>A.thaliana</i>      | NP_188610.1              | XP_961600.1 | DEAD-box ATP-dependent RNA helicase 2                       |
| Btz <sup>d</sup> |                        |                          |             |                                                             |
| RNPS1            | <i>N. crassa</i>       | XP_958016.1              |             | NCU09901                                                    |
|                  | <i>S. pombe</i>        | NP_596549.2              | XP_958016.1 | RNA-binding protein (predicted)                             |
|                  | <i>S. cerevisiae</i>   | NP_015147.1 <sup>e</sup> | XP_956595.1 | Cbc2p                                                       |
|                  | <i>H. sapiens</i>      | NP_00127355<br>6.1       | XP_958016.1 | RNA-binding protein with serine-rich domain 1 isoform c     |
|                  | <i>C. elegans</i>      | NP_497276.2              | XP_958016.1 | Protein RNP-5                                               |
| CBP20            | <i>N. crassa</i>       | XP_956595.1              |             | NCU00210                                                    |
|                  | <i>S. pombe</i>        | NP_596414.1              | XP_956595.1 | nuclear cap-binding complex small subunit (predicted)       |
|                  | <i>S. cerevisiae</i>   | NP_015147.1              | XP_956595.1 | Cbc2p                                                       |
|                  | <i>H. sapiens</i>      | NP_031388.2              | XP_956595.1 | nuclear cap-binding protein subunit 2 isoform 1             |
|                  | <i>C. elegans</i>      | NP_00125055<br>2.1       | XP_956595.1 | NCBP-2, isoform a                                           |
| CBP80            | <i>N. crassa</i>       | XP_961147.1              |             | NCU04187                                                    |
|                  | <i>S. pombe</i>        | NP_594104.1              | XP_961147.1 | nuclear cap-binding complex large subunit (predicted)       |
|                  | <i>S. cerevisiae</i>   | NP_013844.2              | XP_961147.1 | Sto1p                                                       |
|                  | <i>H. sapiens</i>      | NP_002477.1              | XP_961147.1 | nuclear cap-binding protein subunit 1                       |
|                  | <i>C. elegans</i>      | NP_491850.2              | XP_961147.1 | NCBP-1                                                      |
| eRF1             | <i>N. crassa</i>       | XP_957296.1              |             | NCU00410                                                    |
|                  | <i>S. pombe</i>        | NP_594680.1              | XP_957296.1 | eRF1                                                        |
|                  | <i>S. cerevisiae</i>   | NP_009701.3              | XP_957296.1 | eRF1                                                        |
|                  | <i>H. sapiens</i>      | NP_004721.1              | XP_957296.1 | eukaryotic peptide chain release factor subunit 1 isoform 1 |
|                  | <i>C. elegans</i>      | NP_00102410<br>7.2       | XP_957296.1 | ETF-1                                                       |

|                    |                      |                |             |                   |
|--------------------|----------------------|----------------|-------------|-------------------|
| eIF4A <sup>f</sup> | <i>N. crassa</i>     | XP_958421.2    |             | NCU07420          |
|                    | <i>S. pombe</i>      | NP_594854.1    | XP_958421.2 | eIF4A             |
|                    | <i>S. cerevisiae</i> | NP_012397.1    | XP_958421.2 | eIF4A             |
|                    | <i>H. sapiens</i>    | NP_001407.1    | XP_958421.2 | eIF4A-I isoform 1 |
|                    | <i>C. elegans</i>    | NP_001022623.1 | XP_958421.2 | INF-1, isoform a  |

<sup>a</sup>. The *N. crassa* protein was used in BLAST and the entry represents the top hit

<sup>b</sup>. The top hit identified in each organism was used to BLAST *N. crassa* proteins and the entry represents the top hit to evaluate best bidirectional hits

<sup>c</sup>. *N. crassa* Upf3 did not give a significant hit when BLASTed against *C. elegans*, but *C. elegans* SMG4 identifies *N. crassa* NCU03435

<sup>d</sup>. No Btz homolog was identified in *N. crassa*

<sup>e</sup>. The protein identified as *N. crassa* RNPS1 has a best hit to *S. cerevisiae* CBP20 (which reciprocally hits *N. crassa* CBP20)

<sup>f</sup>. eIF4A is distinct from eIF4AIII and the homologs are included here for reference

**Table S2 Phenotypes of selected *N. crassa* deletion strains.**

Phenotypes of the wild-type strain (wt), and indicated mutant strains were assessed as described in Materials and Methods.

| FGSC # | Genotype  | Gene Name | Colony Growth and Morphology (Growth Pattern) |    |       |    | Colony Growth and Morphology (Plate Pigmentation) |    |       |    | 25°C Growth in Slant Cultures |             |                         | 25°C Growth Rate of Basal Hyphae (mm/hr) | 25°C Aerial Hyphae Height (mm/day) |       | Female Sexual Development |                       |                     |
|--------|-----------|-----------|-----------------------------------------------|----|-------|----|---------------------------------------------------|----|-------|----|-------------------------------|-------------|-------------------------|------------------------------------------|------------------------------------|-------|---------------------------|-----------------------|---------------------|
|        |           |           | VM                                            |    | VM+YE |    | VM                                                |    | VM+YE |    | Slant Pigmentation            | Conidiation | Aerial Hyphae Formation |                                          | VM                                 | VM+YE | Properithecium Formation  | Perithecium Formation | Ascospore Formation |
|        |           |           | 25                                            | 37 | 25    | 37 | 25                                                | 37 | 25    | 37 |                               |             |                         |                                          |                                    |       |                           |                       |                     |
| 2489   | wild-type |           | +                                             | +  | +     | +  | +                                                 | +  | +     | +  | +                             | +           | 2.8                     | 20-25                                    | 20-25                              | +     | +                         | +                     |                     |
| 11230  | ΔNCU04242 | upf1      | -                                             | -  | -     | +  | r                                                 | r  | r     | r  | r                             | r           | 2.2                     | 15-20                                    | 15-20                              | +     | +                         | +                     |                     |
| 15706  | ΔNCU05267 | upf2      | -                                             | -  | -     | -  | r                                                 | r  | r     | r  | r                             | short       | 2                       | 5-10                                     | 10-15                              | r     | -                         | -                     |                     |
| 11679  | ΔNCU03435 | upf3      | +                                             | +  | +     | +  | +                                                 | +  | +     | +  | +                             | r           | 2.9                     | 20-25                                    | 15-20                              | +     | +                         | +                     |                     |
| 13031  | ΔNCU04405 | mag o     | -                                             | +  | -     | +  | r                                                 | r  | r     | r  | r                             | +           | 1.7                     | 15-20                                    | 15-20                              | -     | -                         | -                     |                     |
| 15492  | ΔNCU03226 | y14       | -                                             | -  | -     | -  | r                                                 | r  | r     | r  | r                             | +           | 0.4                     | 0-5                                      | 0-5                                | -     | -                         | -                     |                     |
| 19228  | ΔNCU06678 | xrn1      | -                                             | -  | -     | -  | +                                                 | r  | +     | r  | +                             | r           | 1.6                     | 10-15                                    | 10-15                              | +     | +                         | r                     |                     |
| 17986  | ΔNCU04270 | btz       | +                                             | +  | +     | +  | +                                                 | +  | +     | +  | +                             | +           | 2.9                     | 20-25                                    | 20-25                              | r     | +                         | r                     |                     |
| 12342  | ΔNCU09901 | rnps 1    | +                                             | +  | +     | +  | +                                                 | +  | +     | +  | +                             | +           | 3                       | 20-25                                    | 25-30                              | +     | +                         | +                     |                     |
| 18692  | ΔNCU00210 | cbp20     | +                                             | +  | +     | +  | -                                                 | -  | -     | +  | +                             | +           | 2.2                     | 20-25                                    | 20-25                              | +     | +                         | +                     |                     |
| 22440  | ΔNCU04187 | cbp80     | +                                             | +  | -     | +  | +                                                 | +  | +     | +  | +                             | +           | 2.8                     | 20-25                                    | 20-25                              | +     | +                         | +                     |                     |
| 20906  | ΔNCU05889 | eif3e     | -                                             | -  | -     | -  | -                                                 | -  | -     | -  | -                             | r           | 0.8                     | 5-10                                     | 0-5                                | -     | -                         | -                     |                     |

"+" : normal

"-" : not formed

"r" : reduced formation

**Table S3 Identified *N. crassa* transcripts with at least one spliced 3'UTR intron.**

The *Neurospora crassa* gene models from release 7 indicates 321 of the 9728 predicted protein coding genes in *N. crassa* potentially have 3'UTR introns. For 237, the 3'UTR-intron was present in all expected forms of the transcript were further examined according to our recently published RNA-seq data for wt (Wu *et al.* 2014). 31 mRNAs with spliced 3'UTR introns were identified and their predicted 3'UTR and 3'UTR intron-lengths were calculated based on *N. crassa* RNA-seq data; additional information about these genes is also listed.

| Locus    | Predicted 3'UTR Left [intron] Right | Gene Symbol or Description                       | Protein                                           |
|----------|-------------------------------------|--------------------------------------------------|---------------------------------------------------|
| NCU00261 | 471 [64] 327                        | pyr-7                                            | CTP synthase                                      |
| NCU00410 | 235 [55] 366                        | erf1                                             | eukaryotic release factor 1                       |
| NCU00778 | 53 [57] 412                         | sed5 vesicle protein                             | sed5 vesicle protein                              |
| NCU00854 | 131 [58] 21                         | hypothetical protein                             | hypothetical protein                              |
| NCU01234 | 139 [62] 93 or 180                  | eif4a3                                           | eukaryotic initiation factor 4A-12                |
| NCU01312 | 102 [62] 380                        | rca-1                                            | regulator of conidiation in <i>Aspergillus</i> -1 |
| NCU01888 | 98 [69] 321                         | tRNA-specific adenosine deaminase                | tRNA-specific adenosine deaminase                 |
| NCU01907 | 92 [68] 148                         | syntaxin 5                                       | syntaxin 5                                        |
| NCU02174 | 9 [170] 501                         | hypothetical protein                             | hypothetical protein                              |
| NCU02249 | 337 [63] 784                        | hat-5                                            | histone acetyltransferase                         |
| NCU02423 | 36 [93] 880                         | mic-12                                           | mitoferrin-1                                      |
| NCU02885 | 104 [63] 1253                       | stk-20                                           | hypothetical protein                              |
| NCU02948 | 12 [78] 277                         | ncw-4                                            | non-anchored cell wall protein-4                  |
| NCU03226 | 394 [60] 375                        | y14                                              | Y14 protein                                       |
| NCU03491 | 43 [56] 704                         | pad-1                                            | Paddle-1                                          |
| NCU03682 | 184 [71] 250                        | endonuclease/exonuclease/phosphatase             | endonuclease/exonuclease/phosphatase              |
| NCU04650 | 194 [75] 562                        | hypothetical protein                             | hypothetical protein                              |
| NCU04699 | 104 [63] 599                        | chol-2                                           | methylene-fatty-acyl-phospholipid synthase        |
| NCU04986 | 131 [60] 71                         | hypothetical protein                             | hypothetical protein                              |
| NCU05243 | 14 [69] 174                         | hypothetical protein                             | hypothetical protein                              |
| NCU05964 | 69 [65] 741                         | developmental regulator VosA                     | developmental regulator VosA                      |
| NCU06322 | 359 [131] 231                       | drc-2/DNA replication complex GINS protein psf-2 | DNA replication complex GINS protein psf-2        |
| NCU06869 | 541 [55] 436                        | paa-9                                            | cleavage and polyadenylation specificity factor   |
| NCU07408 | 220 [215] 109                       | po                                               | 60S ribosomal protein P0                          |
| NCU07587 | 382 [60] 182                        | div-16/Swi6                                      | Swi6                                              |
| NCU08026 | 71 [63] 697                         | 3' exoribonuclease                               | 3' exoribonuclease                                |
| NCU08727 | 289 [59] 261                        | hypothetical protein                             | hypothetical protein                              |
| NCU09615 | 197 [60] 345                        | hypothetical protein                             | hypothetical protein                              |
| NCU10500 | 118 [77] 492                        | F-box domain-containing protein                  | F-box domain-containing protein                   |
| NCU10572 | 70 [75] 484                         | short chain oxidoreductase                       | short chain oxidoreductase                        |
| NCU11426 | 535 [107] 342                       | nuc-2                                            | nuc-2 protein                                     |

**Table S4 FunCat analysis for identified *N. crassa* transcripts with at least one spliced 3'UTR intron.**

The FunCat database (Ruepp *et al.* 2004) was used to calculate functional enrichments for the products specified by the 31 identified mRNAs with spliced 3'UTR introns as described in Materials and Methods.

| FUNCTIONAL CATEGORY                                                | abs SET | rel SET | genes SET                                                                                                                              | abs GENOME | rel GENOME | rel SET/rel GENOME | P-VALUE |
|--------------------------------------------------------------------|---------|---------|----------------------------------------------------------------------------------------------------------------------------------------|------------|------------|--------------------|---------|
| 01.03 nucleotide/nucleoside/nucleobase metabolism                  | 8       | 28.5    | NCU00261 NCU02423 NCU01234 NCU11426 NCU01888 NCU07408 NCU08026 NCU03226                                                                | 745        | 7.4        | 3.851              | 0.001   |
| 01.03.04 pyrimidine nucleotide/nucleoside/nucleobase metabolism    | 3       | 10.7    | NCU00261 NCU11426 NCU01888                                                                                                             | 159        | 1.57       | 6.815              | 0.009   |
| 01.03.04.01 pyrimidine nucleotide/nucleoside/nucleobase catabolism | 2       | 7.14    | NCU11426 NCU01888                                                                                                                      | 29         | 0.28       | 25.500             | 0.003   |
| 01.03.16 polynucleotide degradation                                | 5       | 17.8    | NCU01234 NCU11426 NCU07408 NCU08026 NCU03226                                                                                           | 220        | 2.18       | 8.165              | 0.000   |
| 01.03.16.01 RNA degradation                                        | 4       | 14.2    | NCU01234 NCU07408 NCU08026 NCU03226                                                                                                    | 153        | 1.51       | 9.404              | 0.001   |
| 01.06.02 membrane lipid metabolism                                 | 3       | 10.7    | NCU00261 NCU04699 NCU11426                                                                                                             | 262        | 2.6        | 4.115              | 0.035   |
| 01.06.02.01 phospholipid metabolism                                | 3       | 10.7    | NCU00261 NCU04699 NCU11426                                                                                                             | 189        | 1.87       | 5.722              | 0.015   |
| 10 CELL CYCLE AND DNA PROCESSING                                   | 9       | 32.1    | NCU02249 NCU01312 NCU01234 NCU04650 NCU11426 NCU06322 NCU07587 NCU02885 NCU03226                                                       | 1715       | 17         | 1.888              | 0.038   |
| 10.01 DNA processing                                               | 8       | 28.5    | NCU02249 NCU01312 NCU01234 NCU11426 NCU06322 NCU07587 NCU02885 NCU03226                                                                | 1117       | 11         | 2.591              | 0.009   |
| 10.01.03 DNA synthesis and replication                             | 4       | 14.2    | NCU02249 NCU01234 NCU06322 NCU07587                                                                                                    | 365        | 3.62       | 3.923              | 0.017   |
| 10.01.05 DNA recombination and DNA repair                          | 5       | 17.8    | NCU02249 NCU01234 NCU11426 NCU07587 NCU02885                                                                                           | 558        | 5.54       | 3.213              | 0.017   |
| 10.01.05.01 DNA repair                                             | 4       | 14.2    | NCU02249 NCU01234 NCU11426 NCU02885                                                                                                    | 477        | 4.73       | 3.002              | 0.041   |
| 10.03.01.01.03 G1/S transition of mitotic cell cycle               | 3       | 10.7    | NCU01312 NCU07587 NCU02885                                                                                                             | 159        | 1.57       | 6.815              | 0.009   |
| 10.03.04 nuclear and chromosomal cycle                             | 3       | 10.7    | NCU04650 NCU11426 NCU02885                                                                                                             | 289        | 2.87       | 3.728              | 0.045   |
| 11 TRANSCRIPTION                                                   | 15      | 53.5    | NCU02249 NCU02423 NCU01312 NCU01234 NCU04986 NCU11426 NCU01888 NCU06869 NCU07408 NCU07587 NCU08026 NCU02948 NCU02885 NCU09615 NCU03226 | 1759       | 17.4       | 3.075              | 0.000   |
| 11.02 RNA synthesis                                                | 10      | 35.7    | NCU02249 NCU01312 NCU01234 NCU04986 NCU11426 NCU06869 NCU07587 NCU02948 NCU09615 NCU03226                                              | 1489       | 14.7       | 2.429              | 0.005   |
| 11.02.03 mRNA synthesis                                            | 10      | 35.7    | NCU02249 NCU01312 NCU01234 NCU04986 NCU11426 NCU06869 NCU07587 NCU02948 NCU09615 NCU03226                                              | 1426       | 14.1       | 2.532              | 0.004   |
| 11.02.03.04 transcriptional control                                | 9       | 32.1    | NCU02249 NCU01312 NCU01234 NCU11426 NCU06869 NCU07587 NCU02948 NCU09615 NCU03226                                                       | 1279       | 12.7       | 2.528              | 0.006   |

|                                                                                       |    |      |                                                                                                                                                                         |      |      |        |       |
|---------------------------------------------------------------------------------------|----|------|-------------------------------------------------------------------------------------------------------------------------------------------------------------------------|------|------|--------|-------|
| 11.04 RNA processing                                                                  | 9  | 32.1 | NCU02423 NCU01312 NCU01234<br>NCU11426 NCU06869 NCU07408<br>NCU08026 NCU02885 NCU03226                                                                                  | 732  | 7.27 | 4.415  | 0.000 |
| 11.04.01 rRNA processing                                                              | 4  | 14.2 | NCU01234 NCU07408 NCU08026<br>NCU03226                                                                                                                                  | 363  | 3.6  | 3.944  | 0.017 |
| 11.04.03 mRNA processing (splicing, 5 <sup>^</sup> -, 3 <sup>^</sup> -end processing) | 9  | 32.1 | NCU02423 NCU01312 NCU01234<br>NCU11426 NCU06869 NCU07408<br>NCU08026 NCU02885 NCU03226                                                                                  | 538  | 5.34 | 6.011  | 0.000 |
| 11.04.03.01 splicing                                                                  | 5  | 17.8 | NCU02423 NCU01312 NCU01234<br>NCU06869 NCU03226                                                                                                                         | 437  | 4.34 | 4.101  | 0.006 |
| 11.04.03.05 3 <sup>^</sup> -end processing                                            | 2  | 7.14 | NCU06869 NCU03226                                                                                                                                                       | 84   | 0.83 | 8.602  | 0.023 |
| 11.04.03.11 control of mRNA stability                                                 | 3  | 10.7 | NCU01234 NCU02885 NCU03226                                                                                                                                              | 95   | 0.94 | 11.383 | 0.002 |
| 12 PROTEIN SYNTHESIS                                                                  | 6  | 21.4 | NCU00410 NCU01234 NCU07408<br>NCU08026 NCU02885 NCU03226                                                                                                                | 753  | 7.47 | 2.865  | 0.016 |
| 12.04 translation                                                                     | 4  | 14.2 | NCU00410 NCU01234 NCU07408<br>NCU03226                                                                                                                                  | 460  | 4.56 | 3.114  | 0.037 |
| 16 PROTEIN WITH BINDING FUNCTION OR COFACTOR REQUIREMENT (structural or catalytic)    | 17 | 60.7 | NCU00410 NCU02249 NCU02423<br>NCU01312 NCU01234 NCU00778<br>NCU04650 NCU11426 NCU06322<br>NCU01888 NCU01907 NCU06869<br>NCU07408 NCU07587 NCU08026<br>NCU02885 NCU03226 | 3639 | 36.1 | 1.681  | 0.007 |
| 16.01 protein binding                                                                 | 13 | 46.4 | NCU00410 NCU02249 NCU01312<br>NCU01234 NCU00778 NCU04650<br>NCU11426 NCU01907 NCU06869<br>NCU07408 NCU07587 NCU02885<br>NCU03226                                        | 2333 | 23.1 | 2.009  | 0.006 |
| 16.03 nucleic acid binding                                                            | 10 | 35.7 | NCU02249 NCU01312 NCU01234<br>NCU04650 NCU11426 NCU06322<br>NCU06869 NCU07587 NCU08026<br>NCU03226                                                                      | 1290 | 12.8 | 2.789  | 0.002 |
| 16.03.01 DNA binding                                                                  | 7  | 25   | NCU02249 NCU01312 NCU01234<br>NCU11426 NCU06322 NCU07587<br>NCU03226                                                                                                    | 854  | 8.48 | 2.948  | 0.007 |
| 16.03.03 RNA binding                                                                  | 6  | 21.4 | NCU01234 NCU04650 NCU11426<br>NCU06869 NCU08026 NCU03226                                                                                                                | 552  | 5.48 | 3.905  | 0.004 |
| 16.07 structural protein binding                                                      | 2  | 7.14 | NCU04650 NCU07408                                                                                                                                                       | 94   | 0.93 | 7.677  | 0.028 |
| 18.02.01.01 enzyme activator                                                          | 4  | 14.2 | NCU00410 NCU11426 NCU06869<br>NCU02885                                                                                                                                  | 376  | 3.73 | 3.807  | 0.019 |
| 18.02.01.02.05 kinase inhibitor                                                       | 2  | 7.14 | NCU11426 NCU02885                                                                                                                                                       | 103  | 1.02 | 7.000  | 0.033 |
| 20 CELLULAR TRANSPORT, TRANSPORT FACILITIES AND TRANSPORT ROUTES                      | 11 | 39.2 | NCU02423 NCU01312 NCU01234<br>NCU00778 NCU04650 NCU11426<br>NCU01907 NCU07587 NCU08026<br>NCU02948 NCU02885                                                             | 2165 | 21.5 | 1.823  | 0.025 |
| 20.01.13 lipid/fatty acid transport                                                   | 3  | 10.7 | NCU02423 NCU11426 NCU07587                                                                                                                                              | 206  | 2.04 | 5.245  | 0.019 |
| 20.09 transport routes                                                                | 8  | 28.5 | NCU02423 NCU01234 NCU00778<br>NCU04650 NCU11426 NCU01907<br>NCU07587 NCU02885                                                                                           | 1454 | 14.4 | 1.979  | 0.040 |
| 20.09.07 vesicular transport (Golgi network, etc.)                                    | 6  | 21.4 | NCU00778 NCU04650 NCU11426<br>NCU01907 NCU07587 NCU02885                                                                                                                | 521  | 5.17 | 4.139  | 0.003 |
| 20.09.07.05 intra Golgi transport                                                     | 2  | 7.14 | NCU00778 NCU01907                                                                                                                                                       | 74   | 0.73 | 9.781  | 0.018 |
| 30.01.09.03 Ca <sup>2+</sup> mediated signal transduction                             | 2  | 7.14 | NCU11426 NCU02885                                                                                                                                                       | 125  | 1.24 | 5.758  | 0.047 |
| 32.01.06 cold shock response                                                          | 2  | 7.14 | NCU01234 NCU11426                                                                                                                                                       | 65   | 0.64 | 11.156 | 0.014 |

|                                              |   |          |                            |     |      |       |       |
|----------------------------------------------|---|----------|----------------------------|-----|------|-------|-------|
| 34.11.09 temperature perception and response | 2 | 7.1<br>4 | NCU02423 NCU11426          | 110 | 1.09 | 6.550 | 0.037 |
| 42.04.03 actin cytoskeleton                  | 3 | 10.<br>7 | NCU11426 NCU07587 NCU02885 | 275 | 2.73 | 3.919 | 0.040 |
|                                              |   |          |                            |     |      |       |       |

<sup>a</sup>The comparison is done to p3\_p13841\_Neu\_crass\_MIPS containing 10067 annotated genes.

28 out of 31 genes are found:

NCU00261 NCU00410 NCU00778 NCU00854 NCU01234 NCU01312 NCU01888 NCU01907 NCU02174 NCU02249 NCU02423 NCU02885 NCU02948  
 NCU03226 NCU03682 NCU04650 NCU04699 NCU04986 NCU05243 NCU05964 NCU06322 NCU06869 NCU07408 NCU07587 NCU08026 NCU08727  
 NCU09615 NCU11426



**Table S5** *N. crassa* strains used in this study.

| Strain                             | Genotype                                                                             | Reference                |
|------------------------------------|--------------------------------------------------------------------------------------|--------------------------|
| FGSC2489                           | <i>mat A (74-OR23-1VA)</i>                                                           | FGSC                     |
| FGSC4200                           | <i>mat a (ORS-SL6a)</i>                                                              | FGSC                     |
| FGSC6103                           | <i>mat A, his-3</i>                                                                  | FGSC                     |
| RANCR6A                            | <i>mat a, his-3, inl</i>                                                             | (Pratt and Aramayo 2002) |
| FGSC16561                          | <i>mat a, Δuc-4(NCU01446)::hph</i>                                                   | (Colot et al. 2006)      |
| FGSC11230                          | <i>mat A, Δupf1::hph</i>                                                             | (Colot et al. 2006)      |
| FGSC15706                          | <i>mat a, Δupf2::hph</i>                                                             | (Colot et al. 2006)      |
| FGSC11679                          | <i>mat a, Δupf3::hph</i>                                                             | (Colot et al. 2006)      |
| FGSC19228                          | <i>mat a, Δxrn1::hph</i>                                                             | (Colot et al. 2006)      |
| FGSC15492                          | <i>mat a, Δy14::hph</i>                                                              | (Colot et al. 2006)      |
| FGSC13031                          | <i>mat A, Δmago::hph</i>                                                             | (Colot et al. 2006)      |
| FGSC22440                          | <i>mat A, Δcbp80::hph</i>                                                            | (Colot et al. 2006)      |
| FGSC18692                          | <i>mat a, Δcbp20::hph</i>                                                            | (Colot et al. 2006)      |
| NZ060                              | <i>mat A, his-3+::upf1<sub>P</sub>-upf1, Δupf1::hph</i>                              | microconidiation         |
| NZ070                              | <i>mat A, his-3+::upf1<sub>P</sub>-upf1-Gly-3xFLAG, Δupf1::hph</i>                   | microconidiation         |
| NZ100                              | <i>mat a, his-3+::upf2<sub>P</sub>-upf2-Gly3xFLAG, Δupf2::hph</i>                    | microconidiation         |
| NZ110                              | <i>mat a, his-3+::upf2<sub>P</sub>-upf2-GlyHATFLAG, Δupf2::hph</i>                   | microconidiation         |
| NZ130                              | <i>mat a, y14<sub>P</sub>-y14-Bar, Δy14::hph</i>                                     | microconidiation         |
| NZ140                              | <i>mat A, mago<sub>P</sub>-mago-Bar, Δmago::hph</i>                                  | microconidiation         |
| NZ150                              | <i>mat a, xrn1<sub>P</sub>-xrn1-Bar, Δxrn1::hph</i>                                  | microconidiation         |
| NZ160                              | <i>mat A, cbp80<sub>P</sub>-cbp80-Bar, Δcbp80::hph</i>                               | microconidiation         |
| NZ170                              | <i>mat a, cbp20<sub>P</sub>-cbp20-Bar, Δcbp20::hph</i>                               | microconidiation         |
| <i>Luciferase reporter strains</i> |                                                                                      |                          |
| NZ1000                             | <i>mat A; his-3+::cox-5<sub>P</sub> cox-5 luc cox-5</i>                              | microconidiation         |
| NZ1001                             | <i>mat A; his-3+::cox-5<sub>P</sub> cox-5 luc cox-5; Δupf1:: hph</i>                 | microconidiation         |
| NZ1005                             | <i>mat A; his-3+::cox-5<sub>P</sub> cox-5 luc eIF4A3+i</i>                           | microconidiation         |
| NZ1006                             | <i>mat A; his-3+::cox-5<sub>P</sub> cox-5 luc eIF4A3+i; Δupf1:: hph</i>              | microconidiation         |
| NZ1011                             | <i>mat A; his-3+::cox-5<sub>P</sub> cox-5 luc eIF4A3-i</i>                           | microconidiation         |
| NZ1012                             | <i>mat A; his-3+::cox-5<sub>P</sub> cox-5 luc eIF4A3-i; Δupf1:: hph</i>              | microconidiation         |
| NZ1017                             | <i>mat A; his-3+::cox-5<sub>P</sub> AAP luc cox-5</i>                                | cross                    |
| NZ1018                             | <i>mat A; his-3+::cox-5<sub>P</sub> AAP luc cox-5; Δupf1:: hph</i>                   | cross                    |
| NZ1021                             | <i>mat a; his-3+::cox-5<sub>P</sub>::AAP<sub>D12N</sub>::Luc::cox-5</i>              | cross                    |
| NZ1030                             | <i>mat A; his-3+::cox-5<sub>P</sub>::AAP<sub>D12N</sub>::Luc::cox-5; Δupf1:: hph</i> | cross                    |
| NZ1031                             | <i>mat A; csr-1::cox-5<sub>P</sub> cox-5 luc cox-5</i>                               | cross                    |
| NZ1036                             | <i>mat a; csr-1::cox-5<sub>P</sub> cox-5 luc cox-5; Δy14:: hph</i>                   | cross                    |
| NZ1037                             | <i>mat A; csr-1::cox-5<sub>P</sub> cox-5 luc eIF4A3+i</i>                            | cross                    |
| NZ1040                             | <i>mat a csr-1::cox-5<sub>P</sub> cox-5 luc eIF4A3+i; Δy14::hph</i>                  | cross                    |
| NZ1041                             | <i>mat A; csr-1::cox-5<sub>P</sub> cox-5 luc eIF4A3-i</i>                            | cross                    |
| NZ1046                             | <i>mat a; csr-1::cox-5<sub>P</sub> cox-5 luc eIF4A3-i; Δy14::hph</i>                 | cross                    |
| NZ1047                             | <i>mat A; his-3+::cox-5<sub>P</sub> cox-5 luc eRF1+i</i>                             | cross                    |
| NZ1052                             | <i>mat A; his-3+::cox-5<sub>P</sub> cox-5 luc eRF1+i; Δupf1:: hph</i>                | cross                    |
| NZ1053                             | <i>mat A; his-3+::cox-5<sub>P</sub> cox-5 luc eRF1-i</i>                             | cross                    |
| NZ1058                             | <i>mat A; his-3+::cox-5<sub>P</sub> cox-5 luc eRF1-i; Δupf1:: hph</i>                | cross                    |
| NZ1059                             | <i>mat A; csr-1::cox-5<sub>P</sub> cox-5 luc cox-5; Δcbp80:: hph</i>                 | cross                    |
| NZ1062                             | <i>mat A csr-1::cox-5<sub>P</sub> cox-5 luc eIF4A3+i; Δcbp80::hph</i>                | cross                    |
| NZ1063                             | <i>mat A csr-1::cox-5<sub>P</sub> cox-5 luc eIF4A3-i;Δcbp80::hph</i>                 | cross                    |
| NZ1065                             | <i>mat A; csr-1::cox-5<sub>P</sub> cox-5 luc cox-5; Δcbp20:: hph</i>                 | cross                    |
| NZ1066                             | <i>mat A csr-1::cox-5<sub>P</sub> cox-5 luc eIF4A3+i; Δcbp20::hph</i>                | cross                    |
| NZ1067                             | <i>mat A csr-1::cox-5<sub>P</sub> cox-5 luc eIF4A3-i; Δcbp20::hph</i>                | cross                    |
| NZ1068                             | <i>mat A; csr-1::cox-5<sub>P</sub> cox-5 luc cox-5; Δcbp20:: hph;Δcbp80:: hph</i>    | cross                    |
| NZ1069                             | <i>mat A; csr-1::cox-5<sub>P</sub> cox-5 luc eIF4A3+i; Δcbp20:: hph;Δcbp80:: hph</i> | cross                    |
| NZ1070                             | <i>mat A; csr-1::cox-5<sub>P</sub> cox-5 luc eIF4A3-i; Δcbp20:: hph;Δcbp80:: hph</i> | cross                    |

**Table S6 Plasmids used for rescuing *N. crassa* deletion mutants.**

| Plasmid | Promoter-coding region                        | PCR oligo | Oligonucleotide sequence, 5' → 3'     | Cloning site | Vector                      |
|---------|-----------------------------------------------|-----------|---------------------------------------|--------------|-----------------------------|
| pZY05   | his3::upf1 <sub>p</sub> -upf1                 | oYZ165    | CTTGGCGGCCGCTTTCTAGAATACAG            | NotI         | pBM61                       |
|         |                                               | oYZ166    | CGGAATTCGACCGCCAGCTAACCCAAC           | EcoRI        |                             |
| pZY43   | his3::upf1 <sub>p</sub> -upf1-Gly-3xFLAG      | oYZ165    | CTTGGCGGCCGCTTTCTAGAATACAG            | NotI         | pCCGC-Gly3xFLAG (FJ457001)  |
|         |                                               | oYZ194    | CGTTAATTAAATCGAAACCTGTCCCGATCTGACTGGC | PacI         |                             |
| pZY68   | his3::upf2 <sub>p</sub> -upf2-Gly3xFLAG       | oYZ219    | GGGCGGCCGAGCTCAAGGGAAGCCAAC           | NotI         | pCCGC-Gly3xFLAG (FJ457001)  |
|         |                                               | oYZ220    | CCACTAGTACTGGGCGATGAGAATC             | SpeI         |                             |
| pZY70   | his3::upf2 <sub>p</sub> -upf2-GlyHATFLAG      | oYZ221    | GGACTAGTGGATGGATCGCCAAG               | SpeI         | pCCGC-GlyHATFLAG (FJ457003) |
|         |                                               | oYZ222    | GGTTAATTAAAGTCCAATCAACATCAC           | PacI         |                             |
| pZY125  | xrn1 <sub>p</sub> -xrn1-[Bar <sup>r</sup> ]   | oYZ477    | GGGCATATGTGTTGTCTTTATTAGAGCCG         | NdeI         | pBARGPE1 (DBP 357)          |
|         |                                               | oYZ478    | CATACGCGTCATCAACTTCTCCCTCG            | MluI         |                             |
| pZY120  | y14 <sub>p</sub> -y14-[Bar <sup>r</sup> ]     | oYZ435    | CTTCATATGAACCGCAACGATTGC              | NdeI         | pBARGPE1 (DBP 357)          |
|         |                                               | oYZ436    | GTCACGCGTTTTTCGTACAGCCTAC             | MluI         |                             |
| pZY104  | mago <sub>p</sub> -mago-[Bar <sup>r</sup> ]   | oYZ437    | CCTCATATGTACTCGTTCGGGTGTTG            | NdeI         | pBARGPE1 (DBP 357)          |
|         |                                               | oYZ438    | GTTCACGCGTCAACAGTCAAGTTGTATC          | MluI         |                             |
| pZY128  | cbp20 <sub>p</sub> -cbp20-[Bar <sup>r</sup> ] | oYZ501    | GGCCATATGGAGGTCTTAACGGAGAC            | NdeI         | pBARGPE1 (DBP 357)          |
|         |                                               | oYZ502    | GTAAACGCGTCGTCCACCATTGAG              | MluI         |                             |
| pZY126  | cbp80 <sub>p</sub> -cbp80-[Bar <sup>r</sup> ] | oYZ479    | GGGCATATGATGGATTATGGCATATAGGG         | NdeI         | pBARGPE1 (DBP 357)          |
|         |                                               | oYZ481    | CATACGCGTGGTGAAGGATGTTGG              | MluI         |                             |

**Table S7 Vectors and oligonucleotides used to construct luciferase reporters.**

| Plasmid | Description                                   | Insert Oligo                  | Oligonucleotide sequence, 5' → 3'   | Cloning site          | Vector(s)                                |
|---------|-----------------------------------------------|-------------------------------|-------------------------------------|-----------------------|------------------------------------------|
| pZY78   | his-3::cox-5 <sub>p</sub>  cox-5 luc          | oYZ335                        | GCTCTAGAGTTACGCGTGCTTGTGATTGGAAG    | XbaI                  | pRMP57                                   |
|         |                                               | oYZ336                        | CGACTAGTTACCGGTAGGAGTGAAGTCTTGCAAAG | SpeI                  |                                          |
| pZY82   | his-3::cox-5 <sub>p</sub>  cox-5 luc cox-5    | oYZ339                        | GCCATTAATTAAGTTTCGCATACTTTTATTGG    | Pacl                  | pZY78                                    |
|         |                                               | oYZ340                        | GCTTAATTAATGCAATAGATCACACGTC        | Pacl                  |                                          |
| pZY118  | his-3::cox-5 <sub>p</sub>  AAP luc cox-5      | oYZ169                        | CTGGGATCCAACCTTGCTTGTGCGC           | BamHI                 | pZY82 <sup>2</sup> , pPR101 <sup>3</sup> |
|         |                                               | oYZ170                        | CGCCCGGGCTTGACTTGAATGGT             | XmaI                  |                                          |
| pZY119  | his-3::cox-5 <sub>p</sub>  D12N luc cox-5     | oYZ169                        | CTGGGATCCAACCTTGCTTGTGCGC           | BamHI                 | pZY82, D12N (pPS101)                     |
|         |                                               | oYZ170                        | CGCCCGGGCTTGACTTGAATGGT             | XmaI                  |                                          |
| pZY92   | his-3::cox-5 <sub>p</sub>  cox-5 luc eIF4A3+I | oYZ330                        | TTATTAATTAAGAGGCTAGCGCGGGG          | Pacl                  | pZY78                                    |
|         |                                               | oYZ332                        | CCACTTAATTAACACCTGCGCGGG            | Pacl                  |                                          |
| pZY94   | his-3::cox-5 <sub>p</sub>  cox-5 luc eIF4A3-I | oYZ330                        | TTATTAATTAAGAGGCTAGCGCGGGG          | Pacl. Overlapping PCR | pZY78                                    |
|         |                                               | oYZ334                        | CAATCTGTAAAGCGTCCTTAAGGCCGACATGC    |                       |                                          |
|         |                                               | oYZ333                        | GCATGTCGGCCTTAAGGACGCTTTACAGATTG    |                       |                                          |
|         |                                               | oYZ332                        | CCACTTAATTAACACCTGCGCGGG            |                       |                                          |
| pZY84   | his-3::cox-5 <sub>p</sub>  cox-5 luc eRF1+I   | oYZ181                        | GCCTTAATTAACAAGTTGAATCCCTCGCCG      | Pacl                  | pZY78                                    |
|         |                                               | oYZ329                        | CGCGTTAATTAATCTCATGAACACTACTGG      | Pacl                  |                                          |
| pZY86   | his-3::cox-5 <sub>p</sub>  cox-5 luc eRF1-I   | oYZ181                        | GCCTTAATTAACAAGTTGAATCCCTCGCCG      | Pacl                  | pZY78                                    |
|         |                                               | oYZ182                        | GGCCTTAATTAACAAAGACAGAATGAGCG       |                       |                                          |
|         |                                               | oYZ329                        | CGCGTTAATTAATCTCATGAACACTACTGG      | Pacl                  |                                          |
| pZY122  | csr-1::cox-5 <sub>p</sub>  cox-5 luc cox-5    | NotI/ClaI fragment from pZY82 |                                     | NotI<br>ClaI          | pCSR1                                    |
| pZY123  | csr-1::cox-5 <sub>p</sub>  cox-5 luc eIF4A3+I | NotI/ClaI fragment from pZY96 |                                     | NotI<br>ClaI          | pCSR1                                    |
| pZY124  | csr-1::cox-5 <sub>p</sub>  cox-5 luc eIF4A3-I | NotI/ClaI fragment from pZY98 |                                     | NotI<br>ClaI          | pCSR1                                    |

**Table S8 Oligonucleotide primers used for 3'RACE.**

| Oligonucleotide for 3'RACE                        |             |                                   |                              |
|---------------------------------------------------|-------------|-----------------------------------|------------------------------|
| PCR oligo                                         |             | Oligonucleotide sequence, 5' → 3' |                              |
| 3'-RACE CDS Primer A                              | oYZ291      | AAGCAGTGGTATCAACGCAGAGTAC(T)30VN  |                              |
| Nested Universal Primer A                         | oYZ294      | AAGCAGTGGTATCAACGCAGAGT           |                              |
| luc-cox-5                                         | Nest oligo1 | oYZ365                            | CGTCTTCGTCGACGAGGTCC         |
|                                                   | Nest oligo2 | oYZ287                            | GGCCAAGAAGGGCGGCAAGATCGCCGTC |
| luc-eIF4A3                                        | Nest oligo1 | oYZ365                            | CGTCTTCGTCGACGAGGTCC         |
|                                                   | Nest oligo2 | oYZ287                            | GGCCAAGAAGGGCGGCAAGATCGCCGTC |
| eIF4A3                                            | Nest oligo1 | oYZ207                            | CCCGCGGTATCGATGTTC           |
|                                                   | Nest oligo2 | oYZ330                            | CCCGCGGTATCGATGTTC           |
| Oligonucleotide for 3' UTR intron (+/-) detection |             |                                   |                              |
| PCR oligo                                         |             | Oligonucleotide sequence, 5' → 3' |                              |
| eIF4A3<br>(411/349)                               | oYZ330      | TTATTAATTAAGAGGCTAGCGGGG          |                              |
|                                                   | oYZ482      | GCGAAATAAACCCGGTAGGGG             |                              |
| eRF1<br>(667/611)                                 | oYZ181      | GCCTTAATTAACAAGTTGAATCCCTCGCCG    |                              |
|                                                   | oYZ182      | GGCCTTAATTAACAAGACAGAATGAGCG      |                              |
| Y14 (458/399)                                     | oYZ300      | CGACCTCCTGCACTCAACAA              |                              |
|                                                   | oYZ301      | CCTCAAGCGTCGGATACTCAA             |                              |

**Table S9 Oligonucleotide primers and templates used to generate probes for northern and Southern analyses.**

| Genes             | Template  | Fragment (bp) | Oligo  | Oligonucleotide sequence, 5' → 3'       |                         |
|-------------------|-----------|---------------|--------|-----------------------------------------|-------------------------|
| arg-2 (NCU07732)  | cDNA*     | 997           | MB001  | GTTATAGGAATTCGCGCTTCCACCATGCCCATCTCC    |                         |
|                   |           |               | MB002  | CTCTATTCCGCTCGAGTTGTAGCCTTCGGAGGTGAGACC |                         |
| eif5 (NCU00366)   |           | 1278          | oYZ405 | GCTCTAGATCAATACCGCCAAAATGGG             |                         |
|                   |           |               | oYZ406 | GCTTAATTAACTCATCGTCCTCCTCCTCAG          |                         |
| eif4a3 (NCU01234) |           | 1150          | oYZ195 | GATCTAGACAGAATCGCCCACCATG               |                         |
|                   |           |               | oYZ196 | GCTTAATTAAGGAGATAAGGTCGGCAACATTCATGGGC  |                         |
| eRF1 (NCU00410)   |           | 757           | oYZ121 | ACTTCGTCTTCTCATCTTCTTAC                 |                         |
|                   |           |               | oYZ120 | AGGCGTTCAGGTCGTTCTTG                    |                         |
| cox-5 (NCU05457)  |           | 396           | MB005  | GTTATAGGAATTCGCGCTTCCACCATGCCCATCTCC    |                         |
|                   |           |               | MB006  | CTCTATTCCGCTCGAGTTGTAGCCTTCGGAGGTGAGACC |                         |
| luc               |           | pRMP57        | 663    | oYZ167                                  | ACATCACCTACGCCGAGTACTTC |
|                   |           |               |        | oYZ188                                  | TCCTCCTCGAAGCGGTACA     |
| his-3 (NCU03139)  | cDNA*     | 1761          | oYZ069 | CCACCGTTGTCGTTGATGAG                    |                         |
|                   |           |               | oYZ068 | GAGTAATCGCCAACGGACTCA                   |                         |
| bar               | pBARGP E1 | 300           | oYZ487 | CAACCACTACATCCAGACAAGCA                 |                         |
|                   |           |               | oYZ486 | ACAGCGACCACGCTCTTGA                     |                         |
| mago (NCU04405)   | cDNA*     | 602           | oYZ377 | GCTCTAGAAGCAACAAACAGCCATGTCAGC          |                         |
|                   |           |               | oYZ378 | CCTTAATTAATGAGGCTTGATCTTGAAGTGC         |                         |
| γ14 (NCU03226)    | cDNA*     | 519           | oYZ375 | GCTCTAGAACGTAGAAGCTGCTAAAATG            |                         |
|                   |           |               | oYZ376 | CCTTAATTAACTCGTCCCTGCCAACG              |                         |

\*DNase I treated total RNA was used as template to synthesize first-strand cDNA with a combination of oligo(dT)<sub>18</sub> and random hexamer primers as described in Materials and Methods

**Table S10 List of transcripts and oligonucleotide primers used for qPCR.**

| Genes             | Oligo  | Position | Oligonucleotide sequence, 5' → 3' |
|-------------------|--------|----------|-----------------------------------|
| 25S               | oYZ029 | 1794     | CCGCGGGAGGGAATAATT                |
|                   | oYZ030 | 1849     | GGAGACCTGCTGCGGTTATG              |
| luc               | oYZ187 | 787      | ACGGCTTCGGCATGTTCA                |
|                   | oYZ188 | 865      | TCCTCCTCGAAGCGGTACA               |
| upf1 (NCU04242)   | MSS169 | 1284     | CAAGCTGCTGGGACACGAA               |
|                   | MSS170 | 1347     | GTGGAACTTCTTGGGCATCGTA            |
| upf2 (NCU05267)   | oYZ055 | 3514     | CCGGGAGAACGATGATTATGA             |
|                   | oYZ056 | 3578     | GATCGGAGCGGTTATGGTGAT             |
| upf3 (NCU03435)   | oYZ061 | 167      | TCGGCGATGAATGGAAAGTC              |
|                   | oYZ062 | 227      | TTGCCAGGCCAGTATGAAAAC             |
| mago (NCU04405)   | oYZ009 | 260      | AATGGCCGACCAAAAACAAA              |
|                   | oYZ010 | 314      | TTCCCGAGGCGGATCTC                 |
| y14 (NCU03226)    | oYZ299 | 429      | ACAGGCGAAGCGGTTACG                |
|                   | oYZ300 | 485      | CCTCAAGCGTCGGATACTCAA             |
| cbp20 (NCU00210)  | oYZ379 | 450      | TCARGGARCGCRTCTRCGARTTGRC         |
|                   | oYZ380 | 508      | TGARTGCRGCTRCGTRCCARACTRT         |
| cbp80 (NCU04187)  | oYZ459 | 470      | TGGRTGTRCTTRCCRCGTRGTTTG          |
|                   | oYZ460 | 533      | GGARACTRGGCRAGTRCTGRCAARGTC       |
| arg-2 (NCU07732)  | MB019  | 315      | CACCCAGCCCTTGATTGG                |
|                   | MB020  | 373      | GGTTGAACTCGTCACGCTCAT             |
| eif5 (NCU00366)   | oYZ251 | 17       | TCAACGTTTCGTCGGGACAA              |
|                   | oYZ252 | 79       | TGGTCTGGATACGCTCCATCT             |
| inl (NCU06666)    | oYZ271 | 1336     | CTTGCTCGCCCCTGAT                  |
|                   | oYZ272 | 1395     | CTGGATGCGGGTCATGATC               |
| eif4a3 (NCU01234) | oYZ023 | 486      | TCATCTCCGACCAGACACA               |
|                   | oYZ024 | 543      | GAGGAGCTCATCGGCTTCAT              |
| eRF1 (NCU00410)   | oYZ119 | 727      | CGTTGCCGGTCTCGTTTT                |
|                   | oYZ120 | 782      | AGGCGTTCAGGTCGTTCTTG              |
| xrn1(NCU06678)    | oYZ357 | 1454     | AGCRCGTRTCTRCCGRTATRCATRCAA       |
|                   | oYZ358 | 1516     | TCGRGCCRGARGTTTAAARTCC            |
| cox-5 (NCU05457)  | MSS177 | 402      | GCAAGAGGCTACCAACGAGTTC            |
|                   | MSS178 | 469      | CTTCGGAGGTGAGACCAGTGA             |
| uc-4 (NCU01446)   | MB063  | 91       | GCCGTCAACTTCGACAACGT              |
|                   | MB064  | 156      | AATGCTGAGGAGAGCGATGAG             |

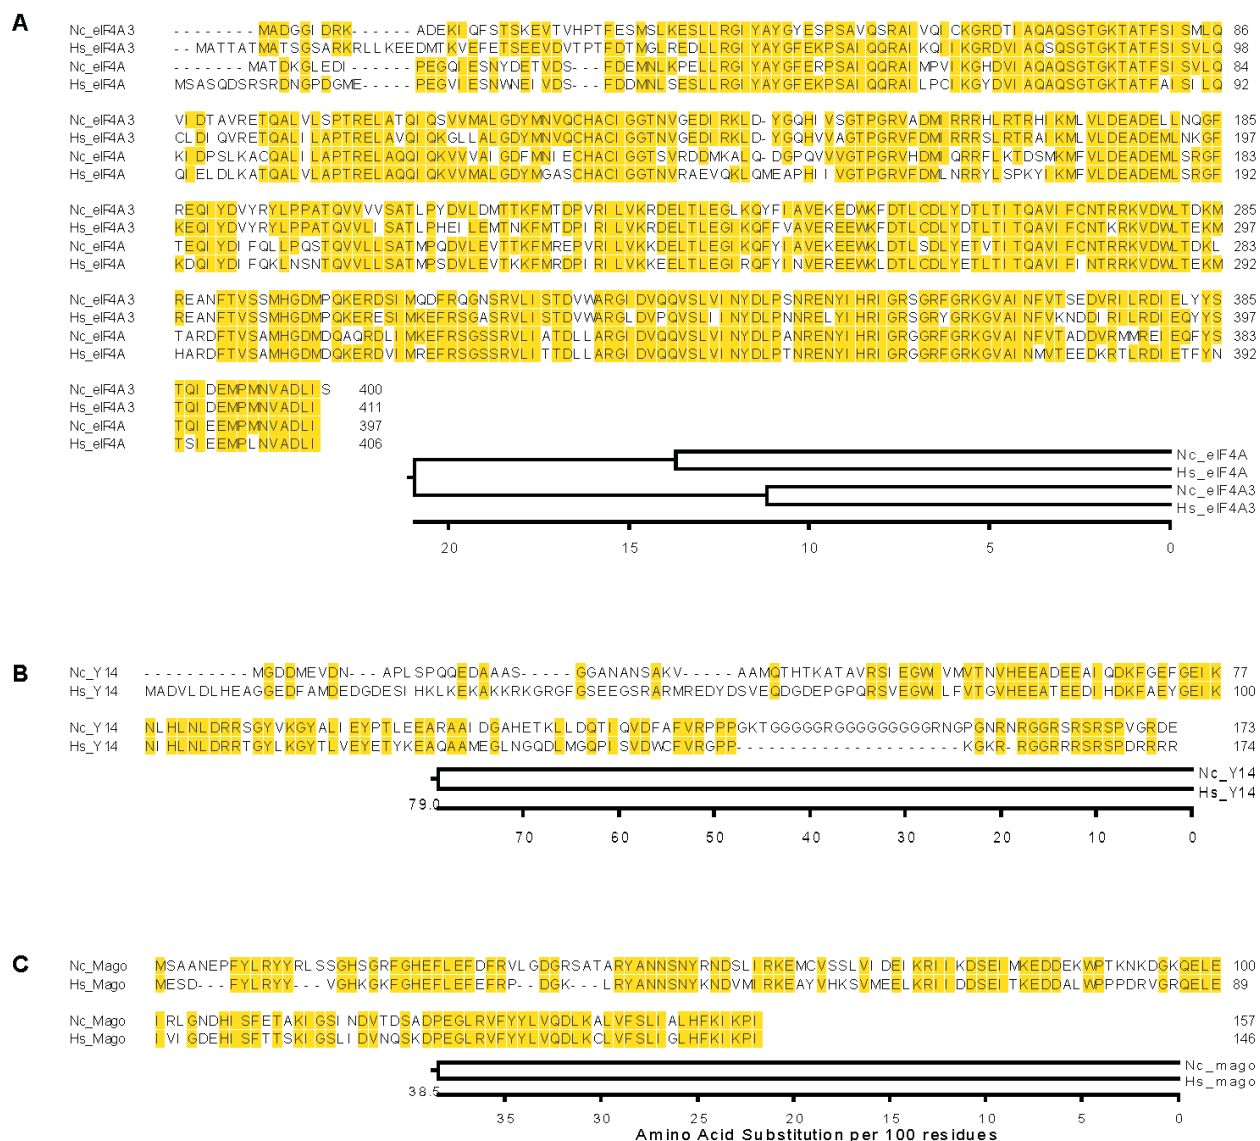

**Figure S1** Proteins sequence alignments of eIF4A3, Y14 and Mago.

Protein sequence alignment showing sequence conservation of (A) eIF4A3 and eIF4A, (B) Y14, (C) Mago; alignments and phylogenetic trees were constructed with CLUSTALW using DNASTAR® (version 11.2.1). Completely conserved residues are highlighted in yellow.

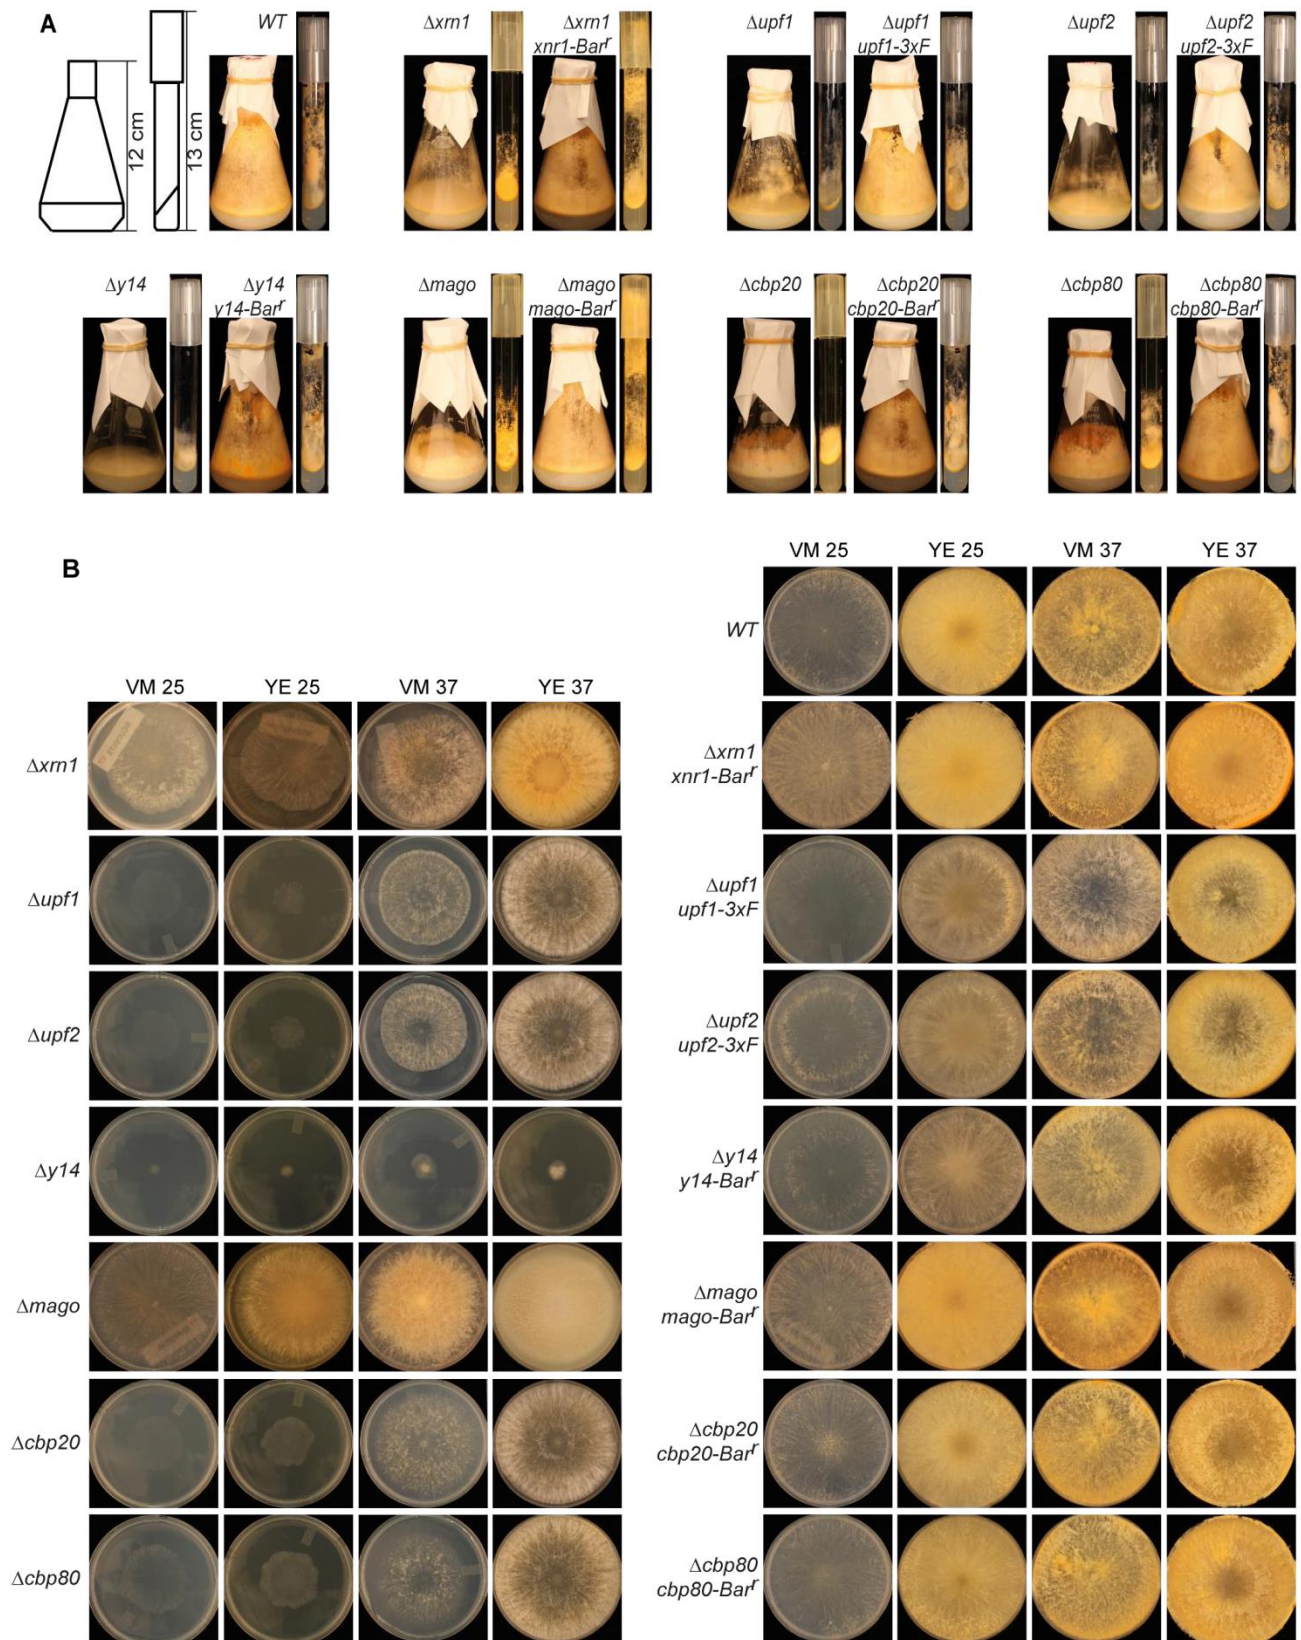



**Figure S2** Phenotypes of mutant strains.

(A) *N. crassa* wild type (wt, FGSC2489), and the indicated deletion and corrected-deletion strains  $\Delta xrn1$  (NCU06678 FGSC19228),  $\Delta xrn1 xrn1$ -Bar<sup>r</sup>,  $\Delta upf1$  (NCU04242, FGSC11230),  $\Delta upf1 his-3::upf1$ -3XFLAG,  $\Delta upf2$  (NCU05267, FGSC15706),  $\Delta upf2 his-3::upf2$ -3XFLAG,  $\Delta y14$  (NCU03226, FGSC15492),  $\Delta y14 y14$ -Bar<sup>r</sup>,  $\Delta mago$  (NCU04405, FGSC13031),  $\Delta mago mago$ -Bar<sup>r</sup>,  $\Delta cbp20$  (NCU00210, FGSC18692),  $\Delta cbp20 cbp20$ -Bar<sup>r</sup>,  $\Delta cbp80$  (NCU04187, FGSC22440), and  $\Delta cbp80 cbp80$ -Bar<sup>r</sup> were grown in 1X VM/1.5% sucrose/2% agar at 25°C for 4 days in 125 ml flasks containing 25 ml medium or for 4 days in 16x125 mm culture tubes containing 3 ml medium. (B) The strains shown in panel (A) were grown by inoculating the centers of 100 mm Petri plates containing 1X VM/1.5% sucrose/2% agar with or without 2% yeast extract (YE) and incubating the plates at 25°C or 37°C for 48 hr.

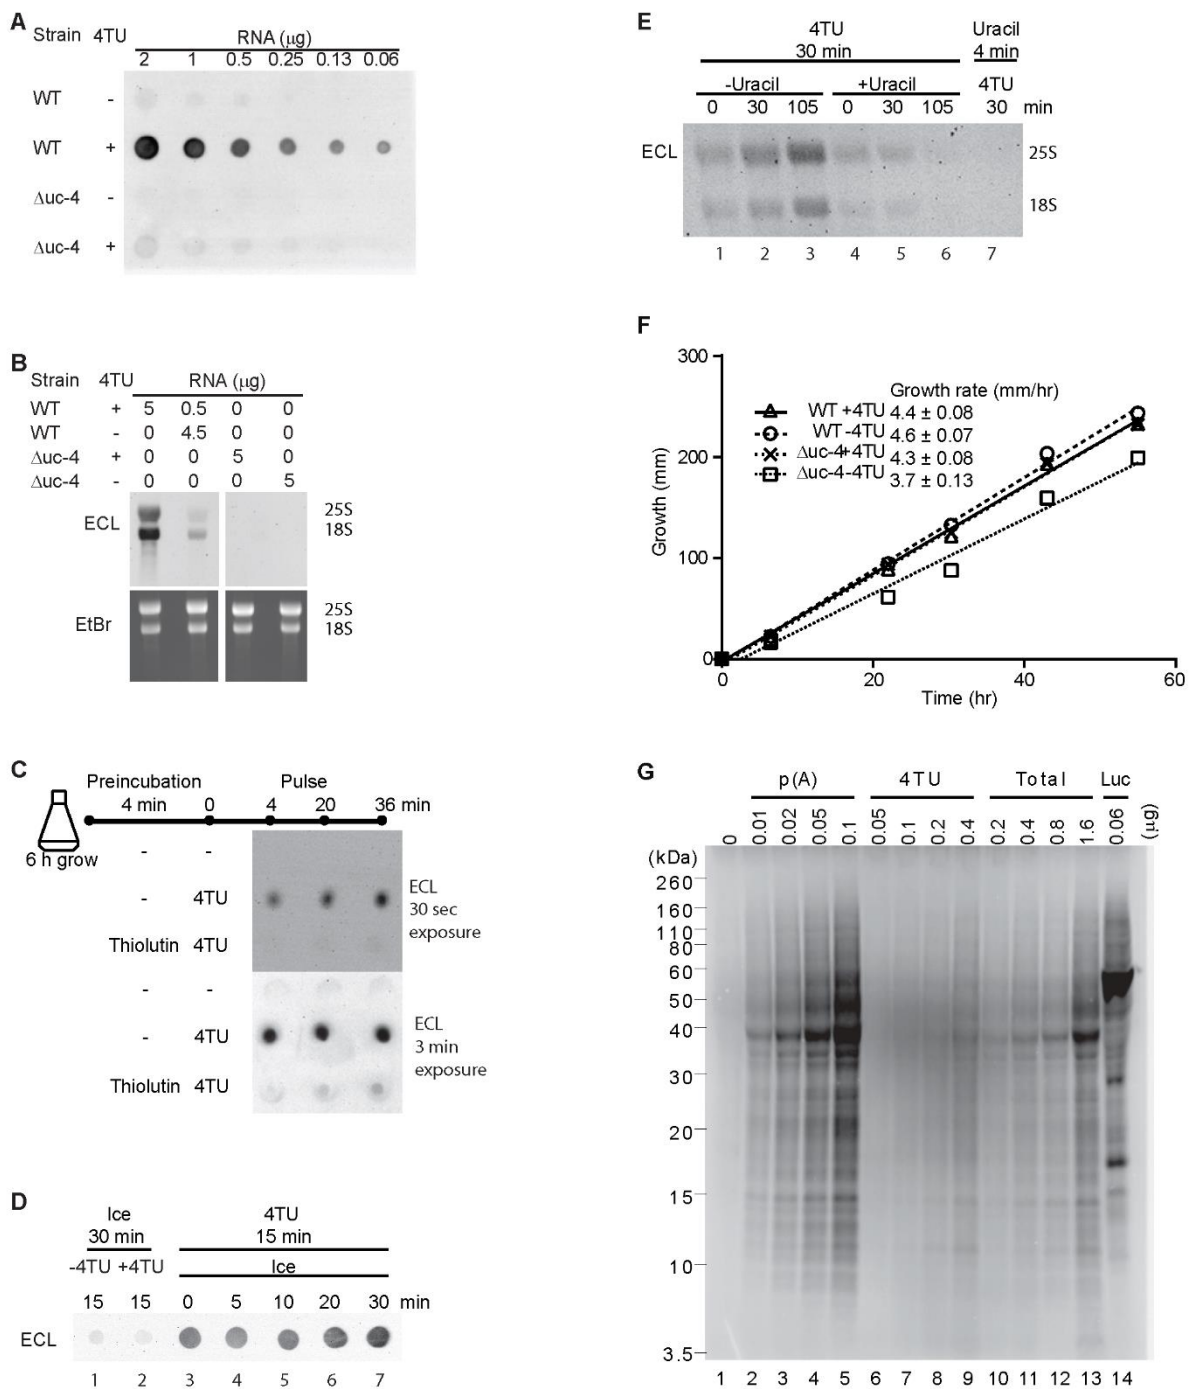

**Figure S3** Validation of the 4TU pulse-chase protocol.

(A) ECL detection of biotinylated RNA prepared from wt or  $\Delta\text{uc-4}$  *N. crassa* cultures germinated for 6 hr and incubated for 15 min with 0.2 mM 4TU (+) or without 4TU (-). Total RNA was prepared and biotinylated. The biotinylation probe is designed to react with the thio-group in 4TU-labeled

RNA. Serial dilutions of biotinylated RNA were spotted directly on nylon membrane at the indicated amounts. (B) Biotinylated RNA (5 µg/lane) was subjected to denaturing agarose gel electrophoresis and then transferred to membrane. The presence of biotinylated-4TU RNA was assessed using streptavidin coupled to horseradish peroxidase and incubation with ECL reagent. 25S and 18S rRNA bands stained with ethidium bromide are shown below. (C) Thiolutin blocks incorporation of 4TU into RNA. *N. crassa* wt cultures were germinated for 6 hr and treated with thiolutin (0.5 µg/ml) or not treated. Then 0.2 mM 4TU was added to cultures and samples were taken 4, 20 and 36 min following addition of 4TU. Total RNA was prepared and biotinylated; 1 µg of biotinylated RNA was spotted on nylon membrane and biotinylated 4TU RNA detected by ECL. Top panel, 30 sec exposure; bottom panel, 3 min exposure. (D) Chilling of cultures on ice reduces incorporation of 4TU. Lanes 1 and 2: 6 hr germinated wt cultures were placed on ice for 30 min; then 0.2 mM 4TU was added (lane 2) or not added (lane 1) and incubation on ice continued for 15 min; incorporation of 4TU into RNA was examined by dot-blotting and ECL. Lanes 3-7: a 6 hr germinated wt culture was incubated with shaking for 15 min at 30°C with 0.2 mM 4TU; then uracil was added to 10 mM and the culture quick-chilled by mixing with 7 ml VM/2% sucrose/10 mM uracil that had been pre-frozen in a 50 ml conical centrifuge tubes. The chilled culture was placed on ice and cells were harvested by filtration at 0, 5, 10, 20 and 30 min time points. For ECL analyses in lanes 1-7, total RNA was prepared and biotinylated; 1 µg of biotinylated RNA was spotted on nylon membrane and biotinylated 4TU RNA detected by ECL. (E) Lanes 1-6: Cultures of conidia from wt were germinated for 5.5 hr and then were treated with 0.2 mM 4TU for 30 min. Then 10 mM uracil was added to cultures using a 0.25M stock prepared in DMSO (+uracil, lanes 4-6) or the equivalent volume of DMSO was added (- uracil, lanes 1-3). Cells were harvested 0, 30 and 105 min later by filtration. In a separate analysis (lane 7), a 7 hr germinated culture were pretreated with 10 mM uracil for 4 min, then incubated with 0.2 mM 4TU for an additional 30 min, and then harvested by filtration. For lanes 1-7, total RNA was prepared and biotinylated; 2.5 µg of biotinylated RNA was subjected to denaturing agarose gel electrophoresis and then transferred to membrane. The presence of biotinylated-4TU 25S and 18S RNA was detected with ECL reagent. (F) Effects of 4TU on growth in race tubes. wt and  $\Delta$ uc-4 strains were grown in race tubes containing VM/1.5% sucrose/2% agar with or without 0.2mM 4TU at 30°C with 12:12 hr L:D for 60 hr. The growth front was marked twice daily and the growth rate was calculated from triplicate experiments. (G) *In vitro* translation of 4TU RNA. Indicated amounts of *N. crassa* poly(A) RNA (Lanes 2-5), 4TU RNA (Lanes 6-9), total RNA (Lanes 10-13) and *in vitro* transcribed synthetic *luc* mRNA that was capped and polyadenylated (Lane 14) were used as templates for *in vitro* translation in micrococcal nuclease-treated wt *N.crassa* cell extracts (Wu *et al.* 2012). A translation reaction with no added template is shown in Lane 1. [<sup>35</sup>S]Met-labeled translation products were separated on a 12% NuPAGE Bis-Tris Gel (Invitrogen NP0343) and detected by phosphorimaging.

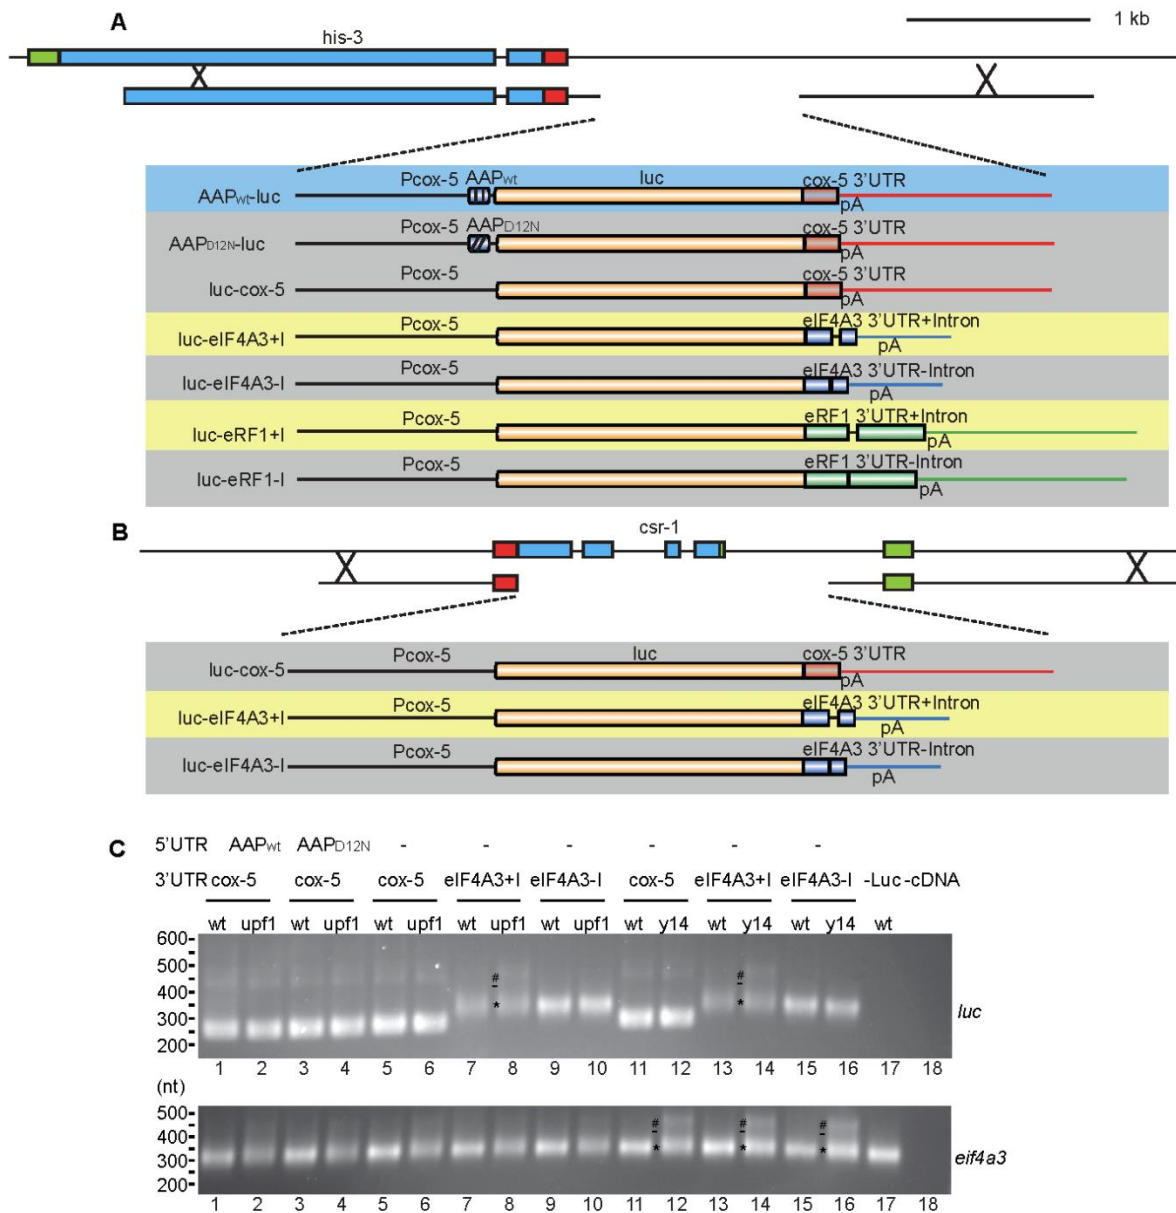

**Figure S4** *In vivo* codon-optimized luciferase (*luc*) constructs integrated at *his-3* or *csr-1* for assessing uORF and 3'UTR intron effects on mRNA stability.

Schematic representation of the reporters integrated at (A) *his-3* locus or (B) *csr-1* locus. For both recipient loci, boxes indicate mRNA exons; green indicates the 5'UTR, blue indicates coding sequences, and red indicates the 3'UTR. All reporters contained the *cox-5* promoter. Constructs contained the wild-type arginine attenuator peptide (AAP) or the mutated or D12N AAP (AAP<sub>wt</sub>-*luc* or AAP<sub>D12N</sub>-*luc*) for analyzing the role of the *arg-2*-encoded uORF. To examine the roles of 3'UTR introns, the *cox-5* 3'UTR (*luc-cox-5*) served as a negative control. The shaded boxes surrounding the constructs indicate the reporter mRNAs contain specific features: blue, uORFs that trigger NMD; yellow, spliced 3'UTRs that trigger NMD; gray, no NMD-triggering features. The functions of 3'UTR introns were examined by comparing intron-containing or intronless *eif4a3* 3'UTRs

(*luc-eIF4A3+I* or *luc-eIF4A-I*) or *erf1* 3'UTRs (*luc-eRF1+I* or *luc-eRF1-I*). (C) 3'RACE analyses of *luc* and *eif4a3* mRNA 3'UTRs in wt and mutant strains. 3'RACE analysis was performed with specific oligos as described in Materials and Methods. The major and minor bands were excised and sequenced. The major 3'RACE fragment from *luc-cox-5* with oligos oYZ287~oYZ294 was 282 bp (top panel, lanes 1-6, 11,12). The minor larger band was 437 bp and represents an mRNA whose 3'UTR was 155-nt longer. The major fragment from *luc-eif4a3* (spliced-intron or intronless reporters) using oligos oYZ287~oYZ294 was 328 bp (top panel, lanes 7-10, 13-16, position indicated by "\*" ; the position for unspliced mRNA is 390 bp and indicated by "-"). No fragments were amplified with these *luc*-specific oligo sets from the wt strain lacking a *luc* reporter or from a no-cDNA control (top panel, lanes 17-18). The same cDNAs were used to obtain the endogenous *eif4a3* 3'RACE fragment of 300 bp using oYZ330~oYZ294 (bottom panel, lanes 1~17, position indicated by "\*" ; the position for unspliced mRNA is 362 bp and indicated by "-"). The larger fragment indicated by "#" observed for *eif4a3* in the  $\Delta y14$  strain (387 bp) represents a 3' extension of the spliced mRNA. This 3' extension (415 bp fragment, indicated by "#") is also observed for the spliced-intron *luc-eif4a3* reporter mRNA in the  $\Delta upf1$  and  $\Delta y14$  strains as determined by sequencing these fragments.

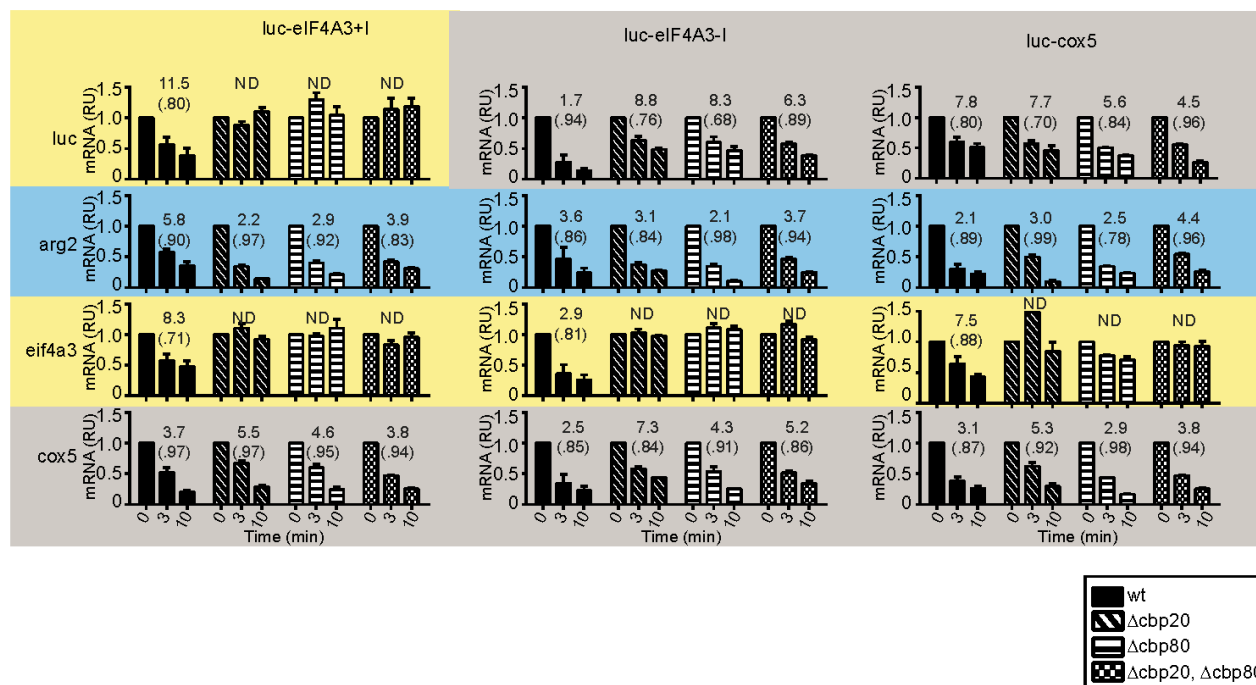

**Figure S5** Stability of 3'UTR-intron containing reporters in  $\Delta cbp20$ ,  $\Delta cbp80$  and  $\Delta cbp20 \Delta cbp80$  strains.

Half-lives of mRNA were measured by 4TU RNA pulse-chase (as described in Figure 2) to analyze the effects of three different 3'UTRs on reporter mRNA stability: *eif4a3* 3'UTR intron (left), intronless *eif4a3* 3'UTR (middle); *cox-5* 3'UTR (right), indicated as luc-eIF4A3+I, luc-eIF4A3-I and luc-cox5, respectively. The different reporters were placed in wt,  $\Delta cbp80$ ,  $\Delta cbp20$  and  $\Delta cbp20 \Delta cbp80$  double mutant strains as indicated.

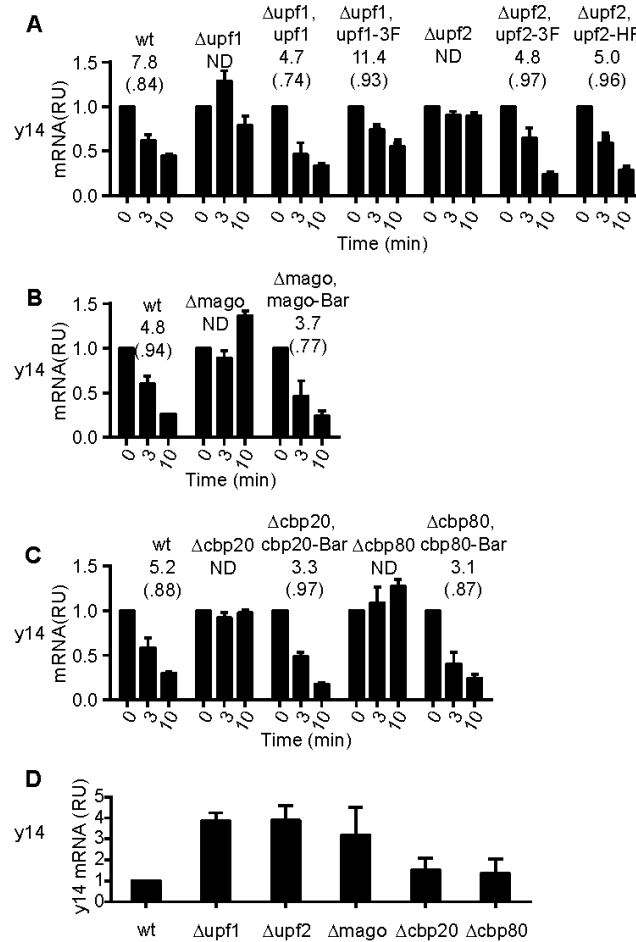

**Figure S6** The stability of the spliced 3'UTR intron-containing *y14* mRNA is affected by NMD, EJC and CBC mutations.

(A-C) Half-lives of mRNA were measured by 4TU RNA pulse-chase as described in Figure 2 to analyze the effects of NMD, EJC and CBC mutations on *y14* transcript stability. 4TU RNA was from the same samples used for analyses of other RNAs in other figures (A) wt,  $\Delta upf1$ ,  $\Delta upf1$  *his-3::upf1*,  $\Delta upf1$  *his-3::upf1-3XFLAG*,  $\Delta upf2$ ,  $\Delta upf2$  *his-3::upf2-3XFLAG* and  $\Delta upf2$ , *his-3::upf2-HAT-FLAG* strains (B) wt,  $\Delta mago$  and  $\Delta mago$  *mago[Bar<sup>r</sup>]* strains (C) wt,  $\Delta cbp20$ ,  $\Delta cbp20$  *cbp20[Bar<sup>r</sup>]*,  $\Delta cbp80$ ,  $\Delta cbp80$  *cbp80[Bar<sup>r</sup>]* strains. (D) Measurement of mRNA levels of *y14*, *eif4a3*, *erf1*, *arg-2*, *eif5* and *cox-5* in total RNA in wt,  $\Delta upf1$ ,  $\Delta upf2$ ,  $\Delta y14$ ,  $\Delta mago$ ,  $\Delta cbp20$  and  $\Delta cbp80$  strains. The data for total RNA levels show the average and standard deviations from four independent RNA preparations (mRNA levels were normalized to 25S rRNA levels in each case and all then all calculated relative to the normalized level in wt).

**File S1**

**Supplemental movie**

Comparisons of asexual growth and development of wt vs *Δupf1* vs *Δupf1 upf1-3XFLAG*; wt vs *Δupf2*, vs *Δupf2 upf2-3xFLAG*; wt vs *Δy14* vs *Δy14 y14-Bar<sup>r</sup>*; wt vs *Δmago* vs *Δmago mago-Bar<sup>r</sup>*; wt vs *Δcbp80* vs *Δcbp80 cbp80-Bar<sup>r</sup>*; wt vs *Δcbp20* vs *Δcbp20 cbp20-Bar<sup>r</sup>*

10<sup>5</sup> conidia in 5 μl sterile water obtained from the indicated strains were inoculated on a sterile Whatman 451 filter disk placed in the center of a VM/1.5% sucrose/2% agar plate and incubated at room temperature with constant light. Images of growing cultures were taken every 3 min or 5 min for a given experiment, and images collected over an approximately 70-h period of time. Time lapse movies were created at 30 images/sec.

**Available for download as an mp4 file at [www.genetics.org/lookup/suppl/doi:10.1534/genetics.115.176743/-/DC1](http://www.genetics.org/lookup/suppl/doi:10.1534/genetics.115.176743/-/DC1)**
