# Supplementary material
Source: PubMed Central journal article supplement (PMC4574236)
Supplement: supp_115.176743_FigureS1.pdf [file supp_115.176743_FigureS1.pdf]

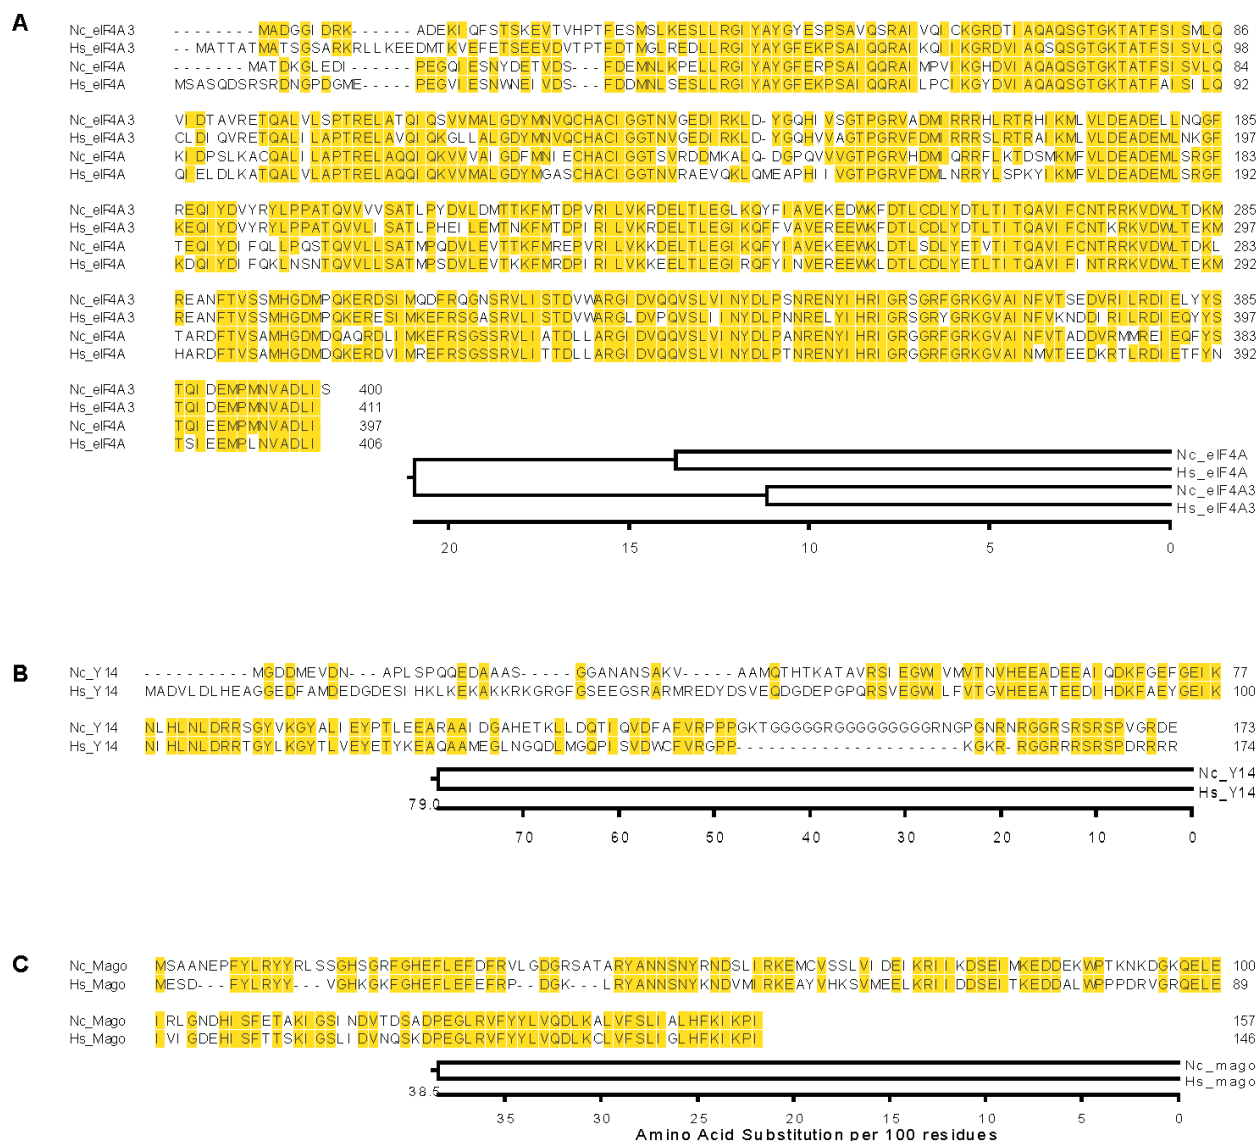

**Figure S1** Proteins sequence alignments of eIF4A3, Y14 and Mago.

Protein sequence alignment showing sequence conservation of (A) eIF4A3 and eIF4A, (B) Y14, (C) Mago; alignments and phylogenetic trees were constructed with CLUSTALW using DNASTAR® (version 11.2.1). Completely conserved residues are highlighted in yellow.
