# Supplementary material
Source: PubMed Central journal article supplement (PMC4574236)
Supplement: supp_115.176743_FigureS2.pdf [file supp_115.176743_FigureS2.pdf]

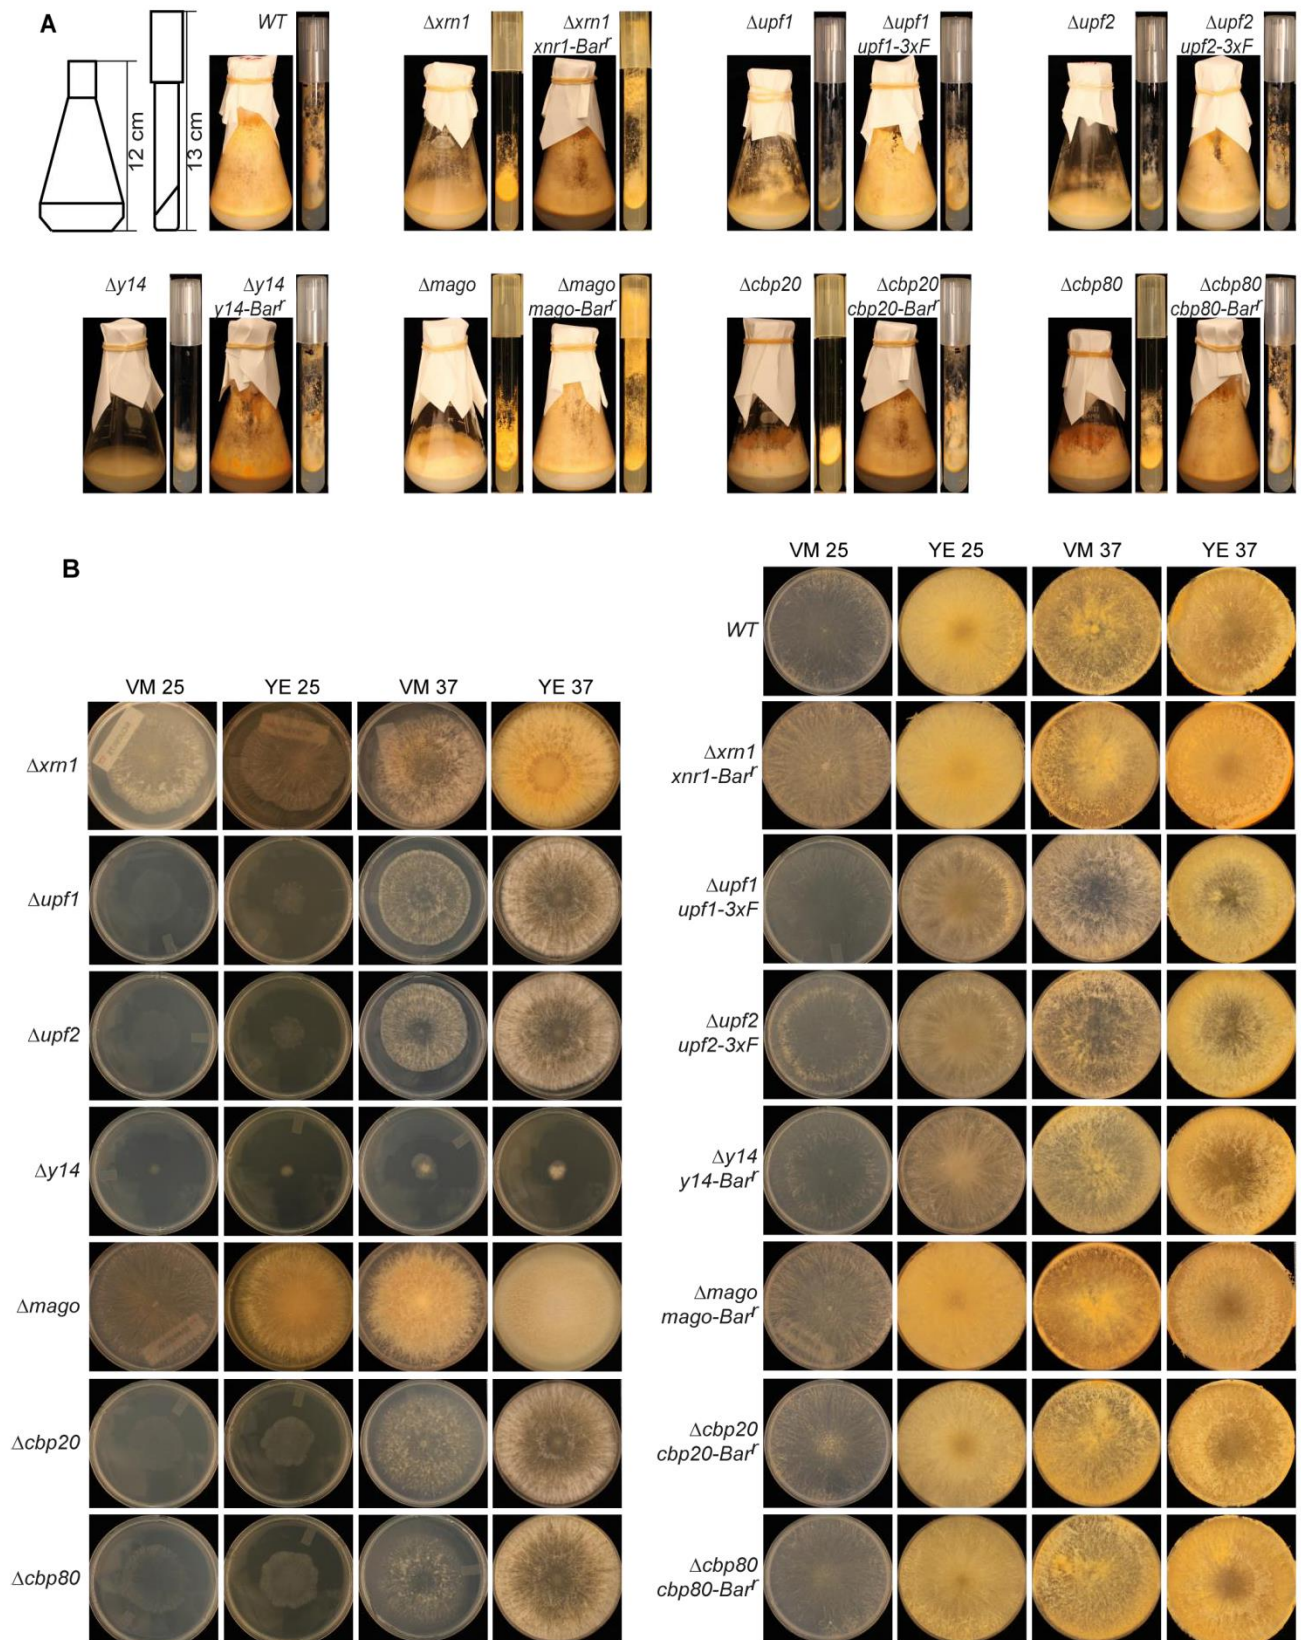

**Figure S2** Phenotypes of mutant strains.

(A) *N. crassa* wild type (wt, FGSC2489), and the indicated deletion and corrected-deletion strains  $\Delta xrn1$  (NCU06678 FGSC19228),  $\Delta xrn1 xrn1$ -Bar<sup>r</sup>,  $\Delta upf1$  (NCU04242, FGSC11230),  $\Delta upf1 his-3::upf1$ -3XFLAG,  $\Delta upf2$  (NCU05267, FGSC15706),  $\Delta upf2 his-3::upf2$ -3XFLAG,  $\Delta y14$  (NCU03226, FGSC15492),  $\Delta y14 y14$ -Bar<sup>r</sup>,  $\Delta mago$  (NCU04405, FGSC13031),  $\Delta mago mago$ -Bar<sup>r</sup>,  $\Delta cbp20$  (NCU00210, FGSC18692),  $\Delta cbp20 cbp20$ -Bar<sup>r</sup>,  $\Delta cbp80$  (NCU04187, FGSC22440), and  $\Delta cbp80 cbp80$ -Bar<sup>r</sup> were grown in 1X VM/1.5% sucrose/2% agar at 25°C for 4 days in 125 ml flasks containing 25 ml medium or for 4 days in 16x125 mm culture tubes containing 3 ml medium. (B) The strains shown in panel (A) were grown by inoculating the centers of 100 mm Petri plates containing 1X VM/1.5% sucrose/2% agar with or without 2% yeast extract (YE) and incubating the plates at 25°C or 37°C for 48 hr.
