# Supplementary material
Source: PubMed Central journal article supplement (PMC4574236)
Supplement: supp_115.176743_FigureS5.pdf [file supp_115.176743_FigureS5.pdf]

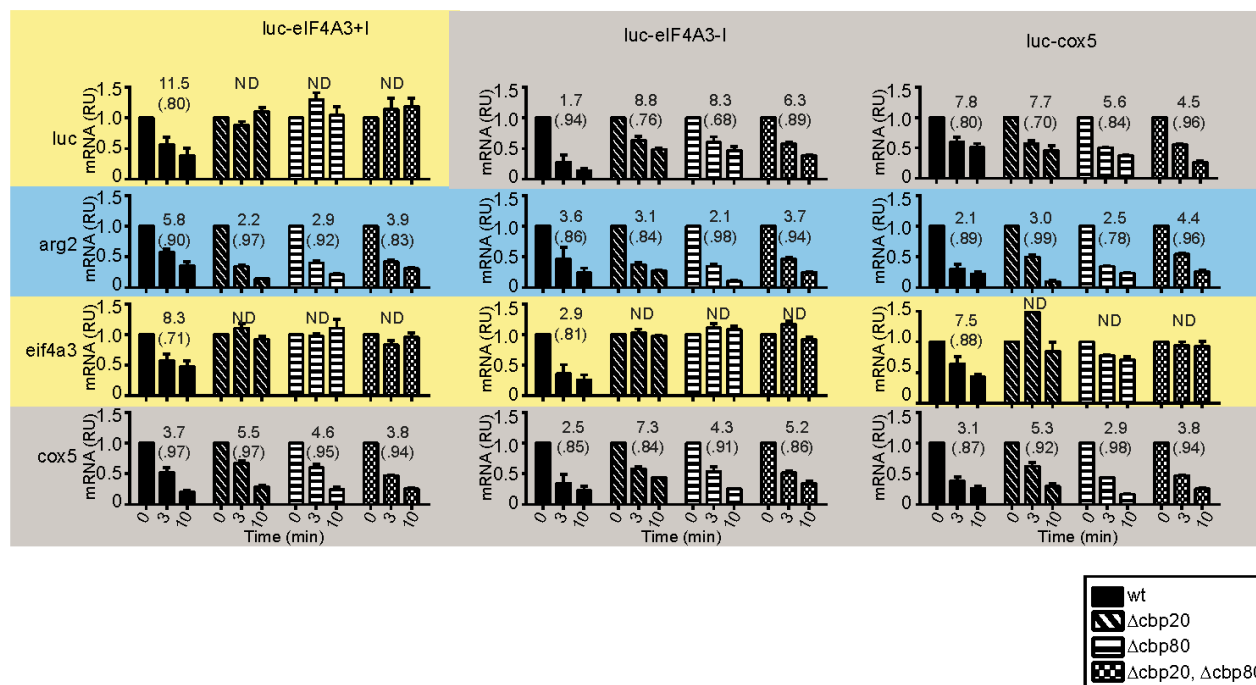

**Figure S5** Stability of 3'UTR-intron containing reporters in  $\Delta cbp20$ ,  $\Delta cbp80$  and  $\Delta cbp20 \Delta cbp80$  strains.

Half-lives of mRNA were measured by 4TU RNA pulse-chase (as described in Figure 2) to analyze the effects of three different 3'UTRs on reporter mRNA stability: *eif4a3* 3'UTR intron (left), intronless *eif4a3* 3'UTR (middle); *cox-5* 3'UTR (right), indicated as luc-eIF4A3+I, luc-eIF4A3-I and luc-cox5, respectively. The different reporters were placed in wt,  $\Delta cbp80$ ,  $\Delta cbp20$  and  $\Delta cbp20 \Delta cbp80$  double mutant strains as indicated.
