# Supplementary material
Source: PubMed Central journal article supplement (PMC4574236)
Supplement: supp_115.176743_TableS1.pdf [file supp_115.176743_TableS1.pdf]

Ying Zhang and Matthew S. Sachs

Supplemental Tables

**Table S1 Homologs of NMD, EJC, CBC factors and other components related to these pathways.**

The *N. crassa* homologs identified represent the best bidirectional hits for each organism as determined using BLASTP at the NCBI website.

Exceptions are indicated.

| Protein Name | Organism             | NCBI Reference Sequence <sup>a</sup> | Reciprocal BLAST <sup>b</sup> | Ref/Note                                       |
|--------------|----------------------|--------------------------------------|-------------------------------|------------------------------------------------|
| Upf1         | <i>N. crassa</i>     | XP_961233.1                          |                               | NCU04242                                       |
|              | <i>S. pombe</i>      | NP_593080.1                          | XP_961233.1                   | Upf1                                           |
|              | <i>S. cerevisiae</i> | NP_013797.1                          | XP_961233.1                   | NAM7                                           |
|              | <i>H. sapiens</i>    | NP_001284478.1                       | XP_961233.1                   | regulator of nonsense transcripts 1 isoform 1  |
|              | <i>C. elegans</i>    | NP_490829.1                          | XP_961233.1                   | SMG-2                                          |
| Upf2         | <i>N. crassa</i>     | XP_961757.2                          |                               | NCU05267                                       |
|              | <i>S. pombe</i>      | NP_593784.1                          | XP_961757.2                   | Upf2                                           |
|              | <i>S. cerevisiae</i> | NP_011944.2                          | XP_961757.2                   | Nmd2p                                          |
|              | <i>H. sapiens</i>    | NP_056357.1                          | XP_961757.2                   | regulator of nonsense transcripts 2            |
|              | <i>C. elegans</i>    | NP_500974.2                          | XP_961757.2                   | SMG-3                                          |
| Upf3         | <i>N. crassa</i>     | XP_956721.1                          |                               | NCU03435                                       |
|              | <i>S. cerevisiae</i> | NP_011586.1                          | XP_956721.1                   | Upf3p                                          |
|              | <i>H. sapiens</i>    | NP_075386.1                          | XP_956721.1                   | regulator of nonsense transcripts 3B isoform 2 |
|              | <i>C. elegans</i>    | (NP_741600.1)<br>c                   | XP_956721.1                   | SMG-4, isoform b                               |
| Xrn1         | <i>N. crassa</i>     | XP_960925.2                          |                               | NCU06678                                       |
|              | <i>S. pombe</i>      | NP_593482.1                          | XP_960925.2                   | exonuclease II Exo2                            |
|              | <i>S. cerevisiae</i> | NP_011342.1                          | XP_960925.2                   | Xrn1p                                          |
|              | <i>H. sapiens</i>    | NP_001269786.1                       | XP_960925.2                   | 5'-3' exoribonuclease 1 isoform c              |
|              | <i>C. elegans</i>    | NP_496945.3                          | XP_960925.2                   | XRN-1                                          |
| Y14          | <i>N. crassa</i>     | XP_965326.1                          |                               | NCU03226                                       |
|              | <i>S. pombe</i>      | NP_594439.1                          | XP_965326.1                   |                                                |
|              | <i>S. cerevisiae</i> | not detected                         |                               |                                                |
|              | <i>H. sapiens</i>    | NP_005096.1                          | XP_965326.1                   |                                                |
|              | <i>C. elegans</i>    | NP_497891.1                          | XP_965326.1                   | RNP-4                                          |
|              | <i>X. laevis</i>     | NP_001079905.1                       | XP_965326.1                   | RNA-binding protein 8A-B                       |

|                  |                        |                          |             |                                                             |
|------------------|------------------------|--------------------------|-------------|-------------------------------------------------------------|
|                  | <i>D. melanogaster</i> | NP_610454.2              | XP_965326.1 | tsunagi                                                     |
|                  | <i>A. thaliana</i>     | NP_564591.1              | XP_965326.1 |                                                             |
| Mago             | <i>N. crassa</i>       | XP_957482.1              |             | NCU04405                                                    |
|                  | <i>S. pombe</i>        | NP_596666.1              | XP_957482.1 | mago nashi                                                  |
|                  | <i>S. cerevisiae</i>   | not detected             |             |                                                             |
|                  | <i>H. sapiens</i>      | NP_060518.1              | XP_957482.1 | mago nashi                                                  |
|                  | <i>C. elegans</i>      | NP_493025.1              | XP_957482.1 | MAG-1                                                       |
|                  | <i>X. laevis</i>       | NP_00107972<br>4.1       | XP_957482.1 | mago nashi                                                  |
|                  | <i>D. melanogaster</i> | NP_476636.1              | XP_957482.1 | mago nashi                                                  |
|                  | <i>A.thaliana</i>      | NP_171716.1              | XP_957482.1 | mago nashi                                                  |
| eIF4AIII         | <i>N. crassa</i>       | XP_961600.1              |             | NCU01234                                                    |
|                  | <i>S. pombe</i>        | NP_592863.1              | XP_961600.1 |                                                             |
|                  | <i>S. cerevisiae</i>   | NP_010304.3              | XP_961600.1 | FAL1                                                        |
|                  | <i>H. sapiens</i>      | NP_055555.1              | XP_961600.1 | eIF4AIII                                                    |
|                  | <i>C. elegans</i>      | NP_490761.2              | XP_961600.1 |                                                             |
|                  | <i>X. laevis</i>       | NP_00108420<br>0.1       | XP_961600.1 | eIF4A-III-B                                                 |
|                  | <i>D. melanogaster</i> | NP_649788.2              | XP_961600.1 | eIF4AIII                                                    |
|                  | <i>A.thaliana</i>      | NP_188610.1              | XP_961600.1 | DEAD-box ATP-dependent RNA helicase 2                       |
| Btz <sup>d</sup> |                        |                          |             |                                                             |
| RNPS1            | <i>N. crassa</i>       | XP_958016.1              |             | NCU09901                                                    |
|                  | <i>S. pombe</i>        | NP_596549.2              | XP_958016.1 | RNA-binding protein (predicted)                             |
|                  | <i>S. cerevisiae</i>   | NP_015147.1 <sup>e</sup> | XP_956595.1 | Cbc2p                                                       |
|                  | <i>H. sapiens</i>      | NP_00127355<br>6.1       | XP_958016.1 | RNA-binding protein with serine-rich domain 1 isoform c     |
|                  | <i>C. elegans</i>      | NP_497276.2              | XP_958016.1 | Protein RNP-5                                               |
| CBP20            | <i>N. crassa</i>       | XP_956595.1              |             | NCU00210                                                    |
|                  | <i>S. pombe</i>        | NP_596414.1              | XP_956595.1 | nuclear cap-binding complex small subunit (predicted)       |
|                  | <i>S. cerevisiae</i>   | NP_015147.1              | XP_956595.1 | Cbc2p                                                       |
|                  | <i>H. sapiens</i>      | NP_031388.2              | XP_956595.1 | nuclear cap-binding protein subunit 2 isoform 1             |
|                  | <i>C. elegans</i>      | NP_00125055<br>2.1       | XP_956595.1 | NCBP-2, isoform a                                           |
| CBP80            | <i>N. crassa</i>       | XP_961147.1              |             | NCU04187                                                    |
|                  | <i>S. pombe</i>        | NP_594104.1              | XP_961147.1 | nuclear cap-binding complex large subunit (predicted)       |
|                  | <i>S. cerevisiae</i>   | NP_013844.2              | XP_961147.1 | Sto1p                                                       |
|                  | <i>H. sapiens</i>      | NP_002477.1              | XP_961147.1 | nuclear cap-binding protein subunit 1                       |
|                  | <i>C. elegans</i>      | NP_491850.2              | XP_961147.1 | NCBP-1                                                      |
| eRF1             | <i>N. crassa</i>       | XP_957296.1              |             | NCU00410                                                    |
|                  | <i>S. pombe</i>        | NP_594680.1              | XP_957296.1 | eRF1                                                        |
|                  | <i>S. cerevisiae</i>   | NP_009701.3              | XP_957296.1 | eRF1                                                        |
|                  | <i>H. sapiens</i>      | NP_004721.1              | XP_957296.1 | eukaryotic peptide chain release factor subunit 1 isoform 1 |
|                  | <i>C. elegans</i>      | NP_00102410<br>7.2       | XP_957296.1 | ETF-1                                                       |

|                    |                      |                |             |                   |
|--------------------|----------------------|----------------|-------------|-------------------|
| eIF4A <sup>f</sup> | <i>N. crassa</i>     | XP_958421.2    |             | NCU07420          |
|                    | <i>S. pombe</i>      | NP_594854.1    | XP_958421.2 | eIF4A             |
|                    | <i>S. cerevisiae</i> | NP_012397.1    | XP_958421.2 | eIF4A             |
|                    | <i>H. sapiens</i>    | NP_001407.1    | XP_958421.2 | eIF4A-I isoform 1 |
|                    | <i>C. elegans</i>    | NP_001022623.1 | XP_958421.2 | INF-1, isoform a  |

<sup>a</sup>. The *N. crassa* protein was used in BLAST and the entry represents the top hit

<sup>b</sup>. The top hit identified in each organism was used to BLAST *N. crassa* proteins and the entry represents the top hit to evaluate best bidirectional hits

<sup>c</sup>. *N. crassa* Upf3 did not give a significant hit when BLASTed against *C. elegans*, but *C. elegans* SMG4 identifies *N. crassa* NCU03435

<sup>d</sup>. No Btz homolog was identified in *N. crassa*

<sup>e</sup>. The protein identified as *N. crassa* RNPS1 has a best hit to *S. cerevisiae* CBP20 (which reciprocally hits *N. crassa* CBP20)

<sup>f</sup>. eIF4A is distinct from eIF4AIII and the homologs are included here for reference
