# Supplementary material
Source: PubMed Central journal article supplement (PMC4574236)
Supplement: supp_115.176743_TableS2.pdf [file supp_115.176743_TableS2.pdf]

**Table S2 Phenotypes of selected *N. crassa* deletion strains.**

Phenotypes of the wild-type strain (wt), and indicated mutant strains were assessed as described in Materials and Methods.

| FGSC # | Genotype  | Gene Name | Colony Growth and Morphology (Growth Pattern) |    |       |    | Colony Growth and Morphology (Plate Pigmentation) |    |       |    | 25°C Growth in Slant Cultures |             |                         | 25°C Growth Rate of Basal Hyphae (mm/hr) | 25°C Aerial Hyphae Height (mm/day) |       | Female Sexual Development |                       |                     |
|--------|-----------|-----------|-----------------------------------------------|----|-------|----|---------------------------------------------------|----|-------|----|-------------------------------|-------------|-------------------------|------------------------------------------|------------------------------------|-------|---------------------------|-----------------------|---------------------|
|        |           |           | VM                                            |    | VM+YE |    | VM                                                |    | VM+YE |    | Slant Pigmentation            | Conidiation | Aerial Hyphae Formation |                                          | VM                                 | VM+YE | Properithecium Formation  | Perithecium Formation | Ascospore Formation |
|        |           |           | 25                                            | 37 | 25    | 37 | 25                                                | 37 | 25    | 37 |                               |             |                         |                                          |                                    |       |                           |                       |                     |
| 2489   | wild-type |           | +                                             | +  | +     | +  | +                                                 | +  | +     | +  | +                             | +           | 2.8                     | 20-25                                    | 20-25                              | +     | +                         | +                     |                     |
| 11230  | ΔNCU04242 | upf1      | -                                             | -  | -     | +  | r                                                 | r  | r     | r  | r                             | r           | 2.2                     | 15-20                                    | 15-20                              | +     | +                         | +                     |                     |
| 15706  | ΔNCU05267 | upf2      | -                                             | -  | -     | -  | r                                                 | r  | r     | r  | r                             | short       | 2                       | 5-10                                     | 10-15                              | r     | -                         | -                     |                     |
| 11679  | ΔNCU03435 | upf3      | +                                             | +  | +     | +  | +                                                 | +  | +     | +  | +                             | r           | 2.9                     | 20-25                                    | 15-20                              | +     | +                         | +                     |                     |
| 13031  | ΔNCU04405 | mag o     | -                                             | +  | -     | +  | r                                                 | r  | r     | r  | r                             | +           | 1.7                     | 15-20                                    | 15-20                              | -     | -                         | -                     |                     |
| 15492  | ΔNCU03226 | y14       | -                                             | -  | -     | -  | r                                                 | r  | r     | r  | r                             | +           | 0.4                     | 0-5                                      | 0-5                                | -     | -                         | -                     |                     |
| 19228  | ΔNCU06678 | xrn1      | -                                             | -  | -     | -  | +                                                 | r  | +     | r  | +                             | r           | 1.6                     | 10-15                                    | 10-15                              | +     | +                         | r                     |                     |
| 17986  | ΔNCU04270 | btz       | +                                             | +  | +     | +  | +                                                 | +  | +     | +  | +                             | +           | 2.9                     | 20-25                                    | 20-25                              | r     | +                         | r                     |                     |
| 12342  | ΔNCU09901 | rnps 1    | +                                             | +  | +     | +  | +                                                 | +  | +     | +  | +                             | +           | 3                       | 20-25                                    | 25-30                              | +     | +                         | +                     |                     |
| 18692  | ΔNCU00210 | cbp20     | +                                             | +  | +     | +  | -                                                 | -  | -     | +  | +                             | +           | 2.2                     | 20-25                                    | 20-25                              | +     | +                         | +                     |                     |
| 22440  | ΔNCU04187 | cbp80     | +                                             | +  | -     | +  | +                                                 | +  | +     | +  | +                             | +           | 2.8                     | 20-25                                    | 20-25                              | +     | +                         | +                     |                     |
| 20906  | ΔNCU05889 | eif3e     | -                                             | -  | -     | -  | -                                                 | -  | -     | -  | -                             | r           | 0.8                     | 5-10                                     | 0-5                                | -     | -                         | -                     |                     |

"+" : normal  
 "-" : not formed  
 "r" : reduced formation
