# Supplementary material
Source: PubMed Central journal article supplement (PMC4574236)
Supplement: supp_115.176743_TableS3.pdf [file supp_115.176743_TableS3.pdf]

**Table S3 Identified *N. crassa* transcripts with at least one spliced 3'UTR intron.**

The *Neurospora crassa* gene models from release 7 indicates 321 of the 9728 predicted protein coding genes in *N. crassa* potentially have 3'UTR introns. For 237, the 3'UTR-intron was present in all expected forms of the transcript were further examined according to our recently published RNA-seq data for wt (Wu *et al.* 2014). 31 mRNAs with spliced 3'UTR introns were identified and their predicted 3'UTR and 3'UTR intron-lengths were calculated based on *N. crassa* RNA-seq data; additional information about these genes is also listed.

| Locus    | Predicted 3'UTR Left [intron] Right | Gene Symbol or Description                       | Protein                                           |
|----------|-------------------------------------|--------------------------------------------------|---------------------------------------------------|
| NCU00261 | 471 [64] 327                        | pyr-7                                            | CTP synthase                                      |
| NCU00410 | 235 [55] 366                        | erf1                                             | eukaryotic release factor 1                       |
| NCU00778 | 53 [57] 412                         | sed5 vesicle protein                             | sed5 vesicle protein                              |
| NCU00854 | 131 [58] 21                         | hypothetical protein                             | hypothetical protein                              |
| NCU01234 | 139 [62] 93 or 180                  | eif4a3                                           | eukaryotic initiation factor 4A-12                |
| NCU01312 | 102 [62] 380                        | rca-1                                            | regulator of conidiation in <i>Aspergillus</i> -1 |
| NCU01888 | 98 [69] 321                         | tRNA-specific adenosine deaminase                | tRNA-specific adenosine deaminase                 |
| NCU01907 | 92 [68] 148                         | syntaxin 5                                       | syntaxin 5                                        |
| NCU02174 | 9 [170] 501                         | hypothetical protein                             | hypothetical protein                              |
| NCU02249 | 337 [63] 784                        | hat-5                                            | histone acetyltransferase                         |
| NCU02423 | 36 [93] 880                         | mic-12                                           | mitoferrin-1                                      |
| NCU02885 | 104 [63] 1253                       | stk-20                                           | hypothetical protein                              |
| NCU02948 | 12 [78] 277                         | ncw-4                                            | non-anchored cell wall protein-4                  |
| NCU03226 | 394 [60] 375                        | y14                                              | Y14 protein                                       |
| NCU03491 | 43 [56] 704                         | pad-1                                            | Paddle-1                                          |
| NCU03682 | 184 [71] 250                        | endonuclease/exonuclease/phosphatase             | endonuclease/exonuclease/phosphatase              |
| NCU04650 | 194 [75] 562                        | hypothetical protein                             | hypothetical protein                              |
| NCU04699 | 104 [63] 599                        | chol-2                                           | methylene-fatty-acyl-phospholipid synthase        |
| NCU04986 | 131 [60] 71                         | hypothetical protein                             | hypothetical protein                              |
| NCU05243 | 14 [69] 174                         | hypothetical protein                             | hypothetical protein                              |
| NCU05964 | 69 [65] 741                         | developmental regulator VosA                     | developmental regulator VosA                      |
| NCU06322 | 359 [131] 231                       | drc-2/DNA replication complex GINS protein psf-2 | DNA replication complex GINS protein psf-2        |
| NCU06869 | 541 [55] 436                        | paa-9                                            | cleavage and polyadenylation specificity factor   |
| NCU07408 | 220 [215] 109                       | po                                               | 60S ribosomal protein P0                          |
| NCU07587 | 382 [60] 182                        | div-16/Swi6                                      | Swi6                                              |
| NCU08026 | 71 [63] 697                         | 3' exoribonuclease                               | 3' exoribonuclease                                |
| NCU08727 | 289 [59] 261                        | hypothetical protein                             | hypothetical protein                              |
| NCU09615 | 197 [60] 345                        | hypothetical protein                             | hypothetical protein                              |
| NCU10500 | 118 [77] 492                        | F-box domain-containing protein                  | F-box domain-containing protein                   |
| NCU10572 | 70 [75] 484                         | short chain oxidoreductase                       | short chain oxidoreductase                        |
| NCU11426 | 535 [107] 342                       | nuc-2                                            | nuc-2 protein                                     |
