# Supplementary material
Source: PubMed Central journal article supplement (PMC4574236)
Supplement: supp_115.176743_TableS4.pdf [file supp_115.176743_TableS4.pdf]

**Table S4 FunCat analysis for identified *N. crassa* transcripts with at least one spliced 3'UTR intron.**

The FunCat database (Ruepp *et al.* 2004) was used to calculate functional enrichments for the products specified by the 31 identified mRNAs with spliced 3'UTR introns as described in Materials and Methods.

| FUNCTIONAL CATEGORY                                                | abs SET | rel SET | genes SET                                                                                                                              | abs GENOME | rel GENOME | rel SET/rel GENOME | P-VALUE |
|--------------------------------------------------------------------|---------|---------|----------------------------------------------------------------------------------------------------------------------------------------|------------|------------|--------------------|---------|
| 01.03 nucleotide/nucleoside/nucleobase metabolism                  | 8       | 28.5    | NCU00261 NCU02423 NCU01234 NCU11426 NCU01888 NCU07408 NCU08026 NCU03226                                                                | 745        | 7.4        | 3.851              | 0.001   |
| 01.03.04 pyrimidine nucleotide/nucleoside/nucleobase metabolism    | 3       | 10.7    | NCU00261 NCU11426 NCU01888                                                                                                             | 159        | 1.57       | 6.815              | 0.009   |
| 01.03.04.01 pyrimidine nucleotide/nucleoside/nucleobase catabolism | 2       | 7.14    | NCU11426 NCU01888                                                                                                                      | 29         | 0.28       | 25.500             | 0.003   |
| 01.03.16 polynucleotide degradation                                | 5       | 17.8    | NCU01234 NCU11426 NCU07408 NCU08026 NCU03226                                                                                           | 220        | 2.18       | 8.165              | 0.000   |
| 01.03.16.01 RNA degradation                                        | 4       | 14.2    | NCU01234 NCU07408 NCU08026 NCU03226                                                                                                    | 153        | 1.51       | 9.404              | 0.001   |
| 01.06.02 membrane lipid metabolism                                 | 3       | 10.7    | NCU00261 NCU04699 NCU11426                                                                                                             | 262        | 2.6        | 4.115              | 0.035   |
| 01.06.02.01 phospholipid metabolism                                | 3       | 10.7    | NCU00261 NCU04699 NCU11426                                                                                                             | 189        | 1.87       | 5.722              | 0.015   |
| 10 CELL CYCLE AND DNA PROCESSING                                   | 9       | 32.1    | NCU02249 NCU01312 NCU01234 NCU04650 NCU11426 NCU06322 NCU07587 NCU02885 NCU03226                                                       | 1715       | 17         | 1.888              | 0.038   |
| 10.01 DNA processing                                               | 8       | 28.5    | NCU02249 NCU01312 NCU01234 NCU11426 NCU06322 NCU07587 NCU02885 NCU03226                                                                | 1117       | 11         | 2.591              | 0.009   |
| 10.01.03 DNA synthesis and replication                             | 4       | 14.2    | NCU02249 NCU01234 NCU06322 NCU07587                                                                                                    | 365        | 3.62       | 3.923              | 0.017   |
| 10.01.05 DNA recombination and DNA repair                          | 5       | 17.8    | NCU02249 NCU01234 NCU11426 NCU07587 NCU02885                                                                                           | 558        | 5.54       | 3.213              | 0.017   |
| 10.01.05.01 DNA repair                                             | 4       | 14.2    | NCU02249 NCU01234 NCU11426 NCU02885                                                                                                    | 477        | 4.73       | 3.002              | 0.041   |
| 10.03.01.01.03 G1/S transition of mitotic cell cycle               | 3       | 10.7    | NCU01312 NCU07587 NCU02885                                                                                                             | 159        | 1.57       | 6.815              | 0.009   |
| 10.03.04 nuclear and chromosomal cycle                             | 3       | 10.7    | NCU04650 NCU11426 NCU02885                                                                                                             | 289        | 2.87       | 3.728              | 0.045   |
| 11 TRANSCRIPTION                                                   | 15      | 53.5    | NCU02249 NCU02423 NCU01312 NCU01234 NCU04986 NCU11426 NCU01888 NCU06869 NCU07408 NCU07587 NCU08026 NCU02948 NCU02885 NCU09615 NCU03226 | 1759       | 17.4       | 3.075              | 0.000   |
| 11.02 RNA synthesis                                                | 10      | 35.7    | NCU02249 NCU01312 NCU01234 NCU04986 NCU11426 NCU06869 NCU07587 NCU02948 NCU09615 NCU03226                                              | 1489       | 14.7       | 2.429              | 0.005   |
| 11.02.03 mRNA synthesis                                            | 10      | 35.7    | NCU02249 NCU01312 NCU01234 NCU04986 NCU11426 NCU06869 NCU07587 NCU02948 NCU09615 NCU03226                                              | 1426       | 14.1       | 2.532              | 0.004   |
| 11.02.03.04 transcriptional control                                | 9       | 32.1    | NCU02249 NCU01312 NCU01234 NCU11426 NCU06869 NCU07587 NCU02948 NCU09615 NCU03226                                                       | 1279       | 12.7       | 2.528              | 0.006   |

|                                                                                       |    |      |                                                                                                                                                                         |      |      |        |       |
|---------------------------------------------------------------------------------------|----|------|-------------------------------------------------------------------------------------------------------------------------------------------------------------------------|------|------|--------|-------|
| 11.04 RNA processing                                                                  | 9  | 32.1 | NCU02423 NCU01312 NCU01234<br>NCU11426 NCU06869 NCU07408<br>NCU08026 NCU02885 NCU03226                                                                                  | 732  | 7.27 | 4.415  | 0.000 |
| 11.04.01 rRNA processing                                                              | 4  | 14.2 | NCU01234 NCU07408 NCU08026<br>NCU03226                                                                                                                                  | 363  | 3.6  | 3.944  | 0.017 |
| 11.04.03 mRNA processing (splicing, 5 <sup>^</sup> -, 3 <sup>^</sup> -end processing) | 9  | 32.1 | NCU02423 NCU01312 NCU01234<br>NCU11426 NCU06869 NCU07408<br>NCU08026 NCU02885 NCU03226                                                                                  | 538  | 5.34 | 6.011  | 0.000 |
| 11.04.03.01 splicing                                                                  | 5  | 17.8 | NCU02423 NCU01312 NCU01234<br>NCU06869 NCU03226                                                                                                                         | 437  | 4.34 | 4.101  | 0.006 |
| 11.04.03.05 3 <sup>^</sup> -end processing                                            | 2  | 7.14 | NCU06869 NCU03226                                                                                                                                                       | 84   | 0.83 | 8.602  | 0.023 |
| 11.04.03.11 control of mRNA stability                                                 | 3  | 10.7 | NCU01234 NCU02885 NCU03226                                                                                                                                              | 95   | 0.94 | 11.383 | 0.002 |
| 12 PROTEIN SYNTHESIS                                                                  | 6  | 21.4 | NCU00410 NCU01234 NCU07408<br>NCU08026 NCU02885 NCU03226                                                                                                                | 753  | 7.47 | 2.865  | 0.016 |
| 12.04 translation                                                                     | 4  | 14.2 | NCU00410 NCU01234 NCU07408<br>NCU03226                                                                                                                                  | 460  | 4.56 | 3.114  | 0.037 |
| 16 PROTEIN WITH BINDING FUNCTION OR COFACTOR REQUIREMENT (structural or catalytic)    | 17 | 60.7 | NCU00410 NCU02249 NCU02423<br>NCU01312 NCU01234 NCU00778<br>NCU04650 NCU11426 NCU06322<br>NCU01888 NCU01907 NCU06869<br>NCU07408 NCU07587 NCU08026<br>NCU02885 NCU03226 | 3639 | 36.1 | 1.681  | 0.007 |
| 16.01 protein binding                                                                 | 13 | 46.4 | NCU00410 NCU02249 NCU01312<br>NCU01234 NCU00778 NCU04650<br>NCU11426 NCU01907 NCU06869<br>NCU07408 NCU07587 NCU02885<br>NCU03226                                        | 2333 | 23.1 | 2.009  | 0.006 |
| 16.03 nucleic acid binding                                                            | 10 | 35.7 | NCU02249 NCU01312 NCU01234<br>NCU04650 NCU11426 NCU06322<br>NCU06869 NCU07587 NCU08026<br>NCU03226                                                                      | 1290 | 12.8 | 2.789  | 0.002 |
| 16.03.01 DNA binding                                                                  | 7  | 25   | NCU02249 NCU01312 NCU01234<br>NCU11426 NCU06322 NCU07587<br>NCU03226                                                                                                    | 854  | 8.48 | 2.948  | 0.007 |
| 16.03.03 RNA binding                                                                  | 6  | 21.4 | NCU01234 NCU04650 NCU11426<br>NCU06869 NCU08026 NCU03226                                                                                                                | 552  | 5.48 | 3.905  | 0.004 |
| 16.07 structural protein binding                                                      | 2  | 7.14 | NCU04650 NCU07408                                                                                                                                                       | 94   | 0.93 | 7.677  | 0.028 |
| 18.02.01.01 enzyme activator                                                          | 4  | 14.2 | NCU00410 NCU11426 NCU06869<br>NCU02885                                                                                                                                  | 376  | 3.73 | 3.807  | 0.019 |
| 18.02.01.02.05 kinase inhibitor                                                       | 2  | 7.14 | NCU11426 NCU02885                                                                                                                                                       | 103  | 1.02 | 7.000  | 0.033 |
| 20 CELLULAR TRANSPORT, TRANSPORT FACILITIES AND TRANSPORT ROUTES                      | 11 | 39.2 | NCU02423 NCU01312 NCU01234<br>NCU00778 NCU04650 NCU11426<br>NCU01907 NCU07587 NCU08026<br>NCU02948 NCU02885                                                             | 2165 | 21.5 | 1.823  | 0.025 |
| 20.01.13 lipid/fatty acid transport                                                   | 3  | 10.7 | NCU02423 NCU11426 NCU07587                                                                                                                                              | 206  | 2.04 | 5.245  | 0.019 |
| 20.09 transport routes                                                                | 8  | 28.5 | NCU02423 NCU01234 NCU00778<br>NCU04650 NCU11426 NCU01907<br>NCU07587 NCU02885                                                                                           | 1454 | 14.4 | 1.979  | 0.040 |
| 20.09.07 vesicular transport (Golgi network, etc.)                                    | 6  | 21.4 | NCU00778 NCU04650 NCU11426<br>NCU01907 NCU07587 NCU02885                                                                                                                | 521  | 5.17 | 4.139  | 0.003 |
| 20.09.07.05 intra Golgi transport                                                     | 2  | 7.14 | NCU00778 NCU01907                                                                                                                                                       | 74   | 0.73 | 9.781  | 0.018 |
| 30.01.09.03 Ca <sup>2+</sup> mediated signal transduction                             | 2  | 7.14 | NCU11426 NCU02885                                                                                                                                                       | 125  | 1.24 | 5.758  | 0.047 |
| 32.01.06 cold shock response                                                          | 2  | 7.14 | NCU01234 NCU11426                                                                                                                                                       | 65   | 0.64 | 11.156 | 0.014 |

|                                              |   |          |                            |     |      |       |       |
|----------------------------------------------|---|----------|----------------------------|-----|------|-------|-------|
| 34.11.09 temperature perception and response | 2 | 7.1<br>4 | NCU02423 NCU11426          | 110 | 1.09 | 6.550 | 0.037 |
| 42.04.03 actin cytoskeleton                  | 3 | 10.<br>7 | NCU11426 NCU07587 NCU02885 | 275 | 2.73 | 3.919 | 0.040 |
|                                              |   |          |                            |     |      |       |       |

<sup>a</sup>The comparison is done to p3\_p13841\_Neu\_crass\_MIPS containing 10067 annotated genes.

28 out of 31 genes are found:

NCU00261 NCU00410 NCU00778 NCU00854 NCU01234 NCU01312 NCU01888 NCU01907 NCU02174 NCU02249 NCU02423 NCU02885 NCU02948  
 NCU03226 NCU03682 NCU04650 NCU04699 NCU04986 NCU05243 NCU05964 NCU06322 NCU06869 NCU07408 NCU07587 NCU08026 NCU08727  
 NCU09615 NCU11426
