# Supplementary material
Source: PubMed Central journal article supplement (PMC4574236)
Supplement: supp_115.176743_TableS5.pdf [file supp_115.176743_TableS5.pdf]

**Table S5** *N. crassa* strains used in this study.

| Strain                             | Genotype                                                                             | Reference                |
|------------------------------------|--------------------------------------------------------------------------------------|--------------------------|
| FGSC2489                           | <i>mat A (74-OR23-1VA)</i>                                                           | FGSC                     |
| FGSC4200                           | <i>mat a (ORS-SL6a)</i>                                                              | FGSC                     |
| FGSC6103                           | <i>mat A, his-3</i>                                                                  | FGSC                     |
| RANCR6A                            | <i>mat a, his-3, inl</i>                                                             | (Pratt and Aramayo 2002) |
| FGSC16561                          | <i>mat a, Δuc-4(NCU01446)::hph</i>                                                   | (Colot et al. 2006)      |
| FGSC11230                          | <i>mat A, Δupf1::hph</i>                                                             | (Colot et al. 2006)      |
| FGSC15706                          | <i>mat a, Δupf2::hph</i>                                                             | (Colot et al. 2006)      |
| FGSC11679                          | <i>mat a, Δupf3::hph</i>                                                             | (Colot et al. 2006)      |
| FGSC19228                          | <i>mat a, Δxrn1::hph</i>                                                             | (Colot et al. 2006)      |
| FGSC15492                          | <i>mat a, Δy14::hph</i>                                                              | (Colot et al. 2006)      |
| FGSC13031                          | <i>mat A, Δmago::hph</i>                                                             | (Colot et al. 2006)      |
| FGSC22440                          | <i>mat A, Δcbp80::hph</i>                                                            | (Colot et al. 2006)      |
| FGSC18692                          | <i>mat a, Δcbp20::hph</i>                                                            | (Colot et al. 2006)      |
| NZ060                              | <i>mat A, his-3+::upf1<sub>P</sub>-upf1, Δupf1::hph</i>                              | microconidiation         |
| NZ070                              | <i>mat A, his-3+::upf1<sub>P</sub>-upf1-Gly-3xFLAG, Δupf1::hph</i>                   | microconidiation         |
| NZ100                              | <i>mat a, his-3+::upf2<sub>P</sub>-upf2-Gly3xFLAG, Δupf2::hph</i>                    | microconidiation         |
| NZ110                              | <i>mat a, his-3+::upf2<sub>P</sub>-upf2-GlyHATFLAG, Δupf2::hph</i>                   | microconidiation         |
| NZ130                              | <i>mat a, y14<sub>P</sub>-y14-Bar, Δy14::hph</i>                                     | microconidiation         |
| NZ140                              | <i>mat A, mago<sub>P</sub>-mago-Bar, Δmago::hph</i>                                  | microconidiation         |
| NZ150                              | <i>mat a, xrn1<sub>P</sub>-xrn1-Bar, Δxrn1::hph</i>                                  | microconidiation         |
| NZ160                              | <i>mat A, cbp80<sub>P</sub>-cbp80-Bar, Δcbp80::hph</i>                               | microconidiation         |
| NZ170                              | <i>mat a, cbp20<sub>P</sub>-cbp20-Bar, Δcbp20::hph</i>                               | microconidiation         |
| <i>Luciferase reporter strains</i> |                                                                                      |                          |
| NZ1000                             | <i>mat A; his-3+::cox-5<sub>P</sub> cox-5 luc cox-5</i>                              | microconidiation         |
| NZ1001                             | <i>mat A; his-3+::cox-5<sub>P</sub> cox-5 luc cox-5; Δupf1:: hph</i>                 | microconidiation         |
| NZ1005                             | <i>mat A; his-3+::cox-5<sub>P</sub> cox-5 luc eIF4A3+i</i>                           | microconidiation         |
| NZ1006                             | <i>mat A; his-3+::cox-5<sub>P</sub> cox-5 luc eIF4A3+i; Δupf1:: hph</i>              | microconidiation         |
| NZ1011                             | <i>mat A; his-3+::cox-5<sub>P</sub> cox-5 luc eIF4A3-i</i>                           | microconidiation         |
| NZ1012                             | <i>mat A; his-3+::cox-5<sub>P</sub> cox-5 luc eIF4A3-i; Δupf1:: hph</i>              | microconidiation         |
| NZ1017                             | <i>mat A; his-3+::cox-5<sub>P</sub> AAP luc cox-5</i>                                | cross                    |
| NZ1018                             | <i>mat A; his-3+::cox-5<sub>P</sub> AAP luc cox-5; Δupf1:: hph</i>                   | cross                    |
| NZ1021                             | <i>mat a; his-3+::cox-5<sub>P</sub>::AAP<sub>D12N</sub>::Luc::cox-5</i>              | cross                    |
| NZ1030                             | <i>mat A; his-3+::cox-5<sub>P</sub>::AAP<sub>D12N</sub>::Luc::cox-5; Δupf1:: hph</i> | cross                    |
| NZ1031                             | <i>mat A; csr-1::cox-5<sub>P</sub> cox-5 luc cox-5</i>                               | cross                    |
| NZ1036                             | <i>mat a; csr-1::cox-5<sub>P</sub> cox-5 luc cox-5; Δy14:: hph</i>                   | cross                    |
| NZ1037                             | <i>mat A; csr-1::cox-5<sub>P</sub> cox-5 luc eIF4A3+i</i>                            | cross                    |
| NZ1040                             | <i>mat a csr-1::cox-5<sub>P</sub> cox-5 luc eIF4A3+i; Δy14::hph</i>                  | cross                    |
| NZ1041                             | <i>mat A; csr-1::cox-5<sub>P</sub> cox-5 luc eIF4A3-i</i>                            | cross                    |
| NZ1046                             | <i>mat a; csr-1::cox-5<sub>P</sub> cox-5 luc eIF4A3-i; Δy14::hph</i>                 | cross                    |
| NZ1047                             | <i>mat A; his-3+::cox-5<sub>P</sub> cox-5 luc eRF1+i</i>                             | cross                    |
| NZ1052                             | <i>mat A; his-3+::cox-5<sub>P</sub> cox-5 luc eRF1+i; Δupf1:: hph</i>                | cross                    |
| NZ1053                             | <i>mat A; his-3+::cox-5<sub>P</sub> cox-5 luc eRF1-i</i>                             | cross                    |
| NZ1058                             | <i>mat A; his-3+::cox-5<sub>P</sub> cox-5 luc eRF1-i; Δupf1:: hph</i>                | cross                    |
| NZ1059                             | <i>mat A; csr-1::cox-5<sub>P</sub> cox-5 luc cox-5; Δcbp80:: hph</i>                 | cross                    |
| NZ1062                             | <i>mat A csr-1::cox-5<sub>P</sub> cox-5 luc eIF4A3+i; Δcbp80::hph</i>                | cross                    |
| NZ1063                             | <i>mat A csr-1::cox-5<sub>P</sub> cox-5 luc eIF4A3-i;Δcbp80::hph</i>                 | cross                    |
| NZ1065                             | <i>mat A; csr-1::cox-5<sub>P</sub> cox-5 luc cox-5; Δcbp20:: hph</i>                 | cross                    |
| NZ1066                             | <i>mat A csr-1::cox-5<sub>P</sub> cox-5 luc eIF4A3+i; Δcbp20::hph</i>                | cross                    |
| NZ1067                             | <i>mat A csr-1::cox-5<sub>P</sub> cox-5 luc eIF4A3-i; Δcbp20::hph</i>                | cross                    |
| NZ1068                             | <i>mat A; csr-1::cox-5<sub>P</sub> cox-5 luc cox-5; Δcbp20:: hph;Δcbp80:: hph</i>    | cross                    |
| NZ1069                             | <i>mat A; csr-1::cox-5<sub>P</sub> cox-5 luc eIF4A3+i; Δcbp20:: hph;Δcbp80:: hph</i> | cross                    |
| NZ1070                             | <i>mat A; csr-1::cox-5<sub>P</sub> cox-5 luc eIF4A3-i; Δcbp20:: hph;Δcbp80:: hph</i> | cross                    |
