# Supplementary material
Source: PubMed Central journal article supplement (PMC4574236)
Supplement: supp_115.176743_TableS6.pdf [file supp_115.176743_TableS6.pdf]

**Table S6 Plasmids used for rescuing *N. crassa* deletion mutants.**

| Plasmid | Promoter-coding region                        | PCR oligo | Oligonucleotide sequence, 5' → 3'     | Cloning site | Vector                      |
|---------|-----------------------------------------------|-----------|---------------------------------------|--------------|-----------------------------|
| pZY05   | his3::upf1 <sub>p</sub> -upf1                 | oYZ165    | CTTGGCGGCCGCTTTCTAGAATACAG            | NotI         | pBM61                       |
|         |                                               | oYZ166    | CGGAATTCGACCGCCAGCTAACCCAAC           | EcoRI        |                             |
| pZY43   | his3::upf1 <sub>p</sub> -upf1-Gly-3xFLAG      | oYZ165    | CTTGGCGGCCGCTTTCTAGAATACAG            | NotI         | pCCGC-Gly3xFLAG (FJ457001)  |
|         |                                               | oYZ194    | CGTTAATTAAATCGAAACCTGTCCCGATCTGACTGGC | PacI         |                             |
| pZY68   | his3::upf2 <sub>p</sub> -upf2-Gly3xFLAG       | oYZ219    | GGGCGGCCGAGCTCAAGGGAAGCCAAC           | NotI         | pCCGC-Gly3xFLAG (FJ457001)  |
|         |                                               | oYZ220    | CCACTAGTACTGGGCGATGAGAATC             | SpeI         |                             |
| pZY70   | his3::upf2 <sub>p</sub> -upf2-GlyHATFLAG      | oYZ221    | GGACTAGTGGATGGATCGCCAAG               | SpeI         | pCCGC-GlyHATFLAG (FJ457003) |
|         |                                               | oYZ222    | GGTTAATTAAAGTCCAATCAACATCAC           | PacI         |                             |
| pZY125  | xrn1 <sub>p</sub> -xrn1-[Bar <sup>r</sup> ]   | oYZ477    | GGGCATATGTGTTGTCTTTATTAGAGCCG         | NdeI         | pBARGPE1 (DBP 357)          |
|         |                                               | oYZ478    | CATACGCGTCATCAACTTCTCCCTCG            | MluI         |                             |
| pZY120  | y14 <sub>p</sub> -y14-[Bar <sup>r</sup> ]     | oYZ435    | CTTCATATGAACCGCAACGATTGC              | NdeI         | pBARGPE1 (DBP 357)          |
|         |                                               | oYZ436    | GTCACGCGTTTTTCGTACAGCCTAC             | MluI         |                             |
| pZY104  | mago <sub>p</sub> -mago-[Bar <sup>r</sup> ]   | oYZ437    | CCTCATATGTACTCGTTCGGGTGTTG            | NdeI         | pBARGPE1 (DBP 357)          |
|         |                                               | oYZ438    | GTTCACGCGTCAACAGTCAAGTTGTATC          | MluI         |                             |
| pZY128  | cbp20 <sub>p</sub> -cbp20-[Bar <sup>r</sup> ] | oYZ501    | GGCCATATGGAGGTCTTAACGGAGAC            | NdeI         | pBARGPE1 (DBP 357)          |
|         |                                               | oYZ502    | GTAAACGCGTCGTCCACCATTGAG              | MluI         |                             |
| pZY126  | cbp80 <sub>p</sub> -cbp80-[Bar <sup>r</sup> ] | oYZ479    | GGGCATATGATGGATTATGGCATATAGGG         | NdeI         | pBARGPE1 (DBP 357)          |
|         |                                               | oYZ481    | CATACGCGTGGTGAAGGATGTTGG              | MluI         |                             |
