# Supplementary material
Source: PubMed Central journal article supplement (PMC4574236)
Supplement: supp_115.176743_TableS7.pdf [file supp_115.176743_TableS7.pdf]

**Table S7 Vectors and oligonucleotides used to construct luciferase reporters.**

| Plasmid | Description                                   | Insert Oligo                  | Oligonucleotide sequence, 5' → 3'   | Cloning site                | Vector(s)                                   |
|---------|-----------------------------------------------|-------------------------------|-------------------------------------|-----------------------------|---------------------------------------------|
| pZY78   | his-3::cox-5 <sub>p</sub>  cox-5 luc          | oYZ335                        | GCTCTAGAGTTACGCGTGCTTGTGATTGGAAG    | XbaI                        | pRMP57                                      |
|         |                                               | oYZ336                        | CGACTAGTTACCGGTAGGAGTGAAGTCTTGCAAAG | SpeI                        |                                             |
| pZY82   | his-3::cox-5 <sub>p</sub>  cox-5 luc cox-5    | oYZ339                        | GCCATTAATTAAGTTTCGCATACTTTTATTGG    | Pacl                        | pZY78                                       |
|         |                                               | oYZ340                        | GCTTAATTAATGCAATAGATCACACGTC        | Pacl                        |                                             |
| pZY118  | his-3::cox-5 <sub>p</sub>  AAP luc cox-5      | oYZ169                        | CTGGGATCCAACCTTGCTTGTGCGC           | BamHI                       | pZY82 <sup>2</sup> ,<br>pPR101 <sup>3</sup> |
|         |                                               | oYZ170                        | CGCCCGGGCTTGACTTGAATGGT             | XmaI                        |                                             |
| pZY119  | his-3::cox-5 <sub>p</sub>  D12N luc cox-5     | oYZ169                        | CTGGGATCCAACCTTGCTTGTGCGC           | BamHI                       | pZY82,<br>D12N<br>(pPS101)                  |
|         |                                               | oYZ170                        | CGCCCGGGCTTGACTTGAATGGT             | XmaI                        |                                             |
| pZY92   | his-3::cox-5 <sub>p</sub>  cox-5 luc eIF4A3-I | oYZ330                        | TTATTAATTAAGAGGCTAGCGCGGGG          | Pacl                        | pZY78                                       |
|         |                                               | oYZ332                        | CCACTTAATTAACACCTGCGCGGG            | Pacl                        |                                             |
| pZY94   | his-3::cox-5 <sub>p</sub>  cox-5 luc eIF4A3-I | oYZ330                        | TTATTAATTAAGAGGCTAGCGCGGGG          | Pacl.<br>Overlapping<br>PCR | pZY78                                       |
|         |                                               | oYZ334                        | CAATCTGTAAAGCGTCCTTAAGGCCGACATGC    |                             |                                             |
|         |                                               | oYZ333                        | GCATGTCGGCCTTAAGGACGCTTTACAGATTG    |                             |                                             |
|         |                                               | oYZ332                        | CCACTTAATTAACACCTGCGCGGG            |                             |                                             |
| pZY84   | his-3::cox-5 <sub>p</sub>  cox-5 luc eRF1-I   | oYZ181                        | GCCTTAATTAACAAGTTGAATCCCTCGCCG      | Pacl                        | pZY78                                       |
|         |                                               | oYZ329                        | CGCGTTAATTAATCTCATGAACACTACTGG      | Pacl                        |                                             |
| pZY86   | his-3::cox-5 <sub>p</sub>  cox-5 luc eRF1-I   | oYZ181                        | GCCTTAATTAACAAGTTGAATCCCTCGCCG      | Pacl                        | pZY78                                       |
|         |                                               | oYZ182                        | GGCCTTAATTAACAAAGACAGAATGAGCG       |                             |                                             |
|         |                                               | oYZ329                        | CGCGTTAATTAATCTCATGAACACTACTGG      | Pacl                        |                                             |
| pZY122  | csr-1::cox-5 <sub>p</sub>  cox-5 luc cox-5    | NotI/Clal fragment from pZY82 |                                     | NotI<br>Clal                | pCSR1                                       |
| pZY123  | csr-1::cox-5 <sub>p</sub>  cox-5 luc eIF4A3-I | NotI/Clal fragment from pZY96 |                                     | NotI<br>Clal                | pCSR1                                       |
| pZY124  | csr-1::cox-5 <sub>p</sub>  cox-5 luc eIF4A3-I | NotI/Clal fragment from pZY98 |                                     | NotI<br>Clal                | pCSR1                                       |
