# Supplementary material
Source: PubMed Central journal article supplement (PMC4574236)
Supplement: supp_115.176743_TableS8.pdf [file supp_115.176743_TableS8.pdf]

**Table S8 Oligonucleotide primers used for 3'RACE.**

| Oligonucleotide for 3'RACE                        |             |                                   |                              |
|---------------------------------------------------|-------------|-----------------------------------|------------------------------|
| PCR oligo                                         |             | Oligonucleotide sequence, 5' → 3' |                              |
| 3'-RACE CDS Primer A                              | oYZ291      | AAGCAGTGGTATCAACGCAGAGTAC(T)30VN  |                              |
| Nested Universal Primer A                         | oYZ294      | AAGCAGTGGTATCAACGCAGAGT           |                              |
| luc-cox-5                                         | Nest oligo1 | oYZ365                            | CGTCTTCGTCGACGAGGTCC         |
|                                                   | Nest oligo2 | oYZ287                            | GGCCAAGAAGGGCGGCAAGATCGCCGTC |
| luc-eIF4A3                                        | Nest oligo1 | oYZ365                            | CGTCTTCGTCGACGAGGTCC         |
|                                                   | Nest oligo2 | oYZ287                            | GGCCAAGAAGGGCGGCAAGATCGCCGTC |
| eIF4A3                                            | Nest oligo1 | oYZ207                            | CCCGCGGTATCGATGTTCC          |
|                                                   | Nest oligo2 | oYZ330                            | CCCGCGGTATCGATGTTCC          |
| Oligonucleotide for 3' UTR intron (+/-) detection |             |                                   |                              |
| PCR oligo                                         |             | Oligonucleotide sequence, 5' → 3' |                              |
| eIF4A3<br>(411/349)                               | oYZ330      | TTATTAATTAAGAGGCTAGCGGGG          |                              |
|                                                   | oYZ482      | GCGAAATAAACCCCGGTAGGGG            |                              |
| eRF1<br>(667/611)                                 | oYZ181      | GCCTTAATTAACAAGTTGAATCCCTCGCCG    |                              |
|                                                   | oYZ182      | GGCCTTAATTAACAAGACAGAATGAGCG      |                              |
| Y14 (458/399)                                     | oYZ300      | CGACCTCCTGCACTCAACAA              |                              |
|                                                   | oYZ301      | CCTCAAGCGTCGGATACTCAA             |                              |
