# Supplementary material
Source: PubMed Central journal article supplement (PMC4574236)
Supplement: supp_115.176743_TableS9.pdf [file supp_115.176743_TableS9.pdf]

**Table S9 Oligonucleotide primers and templates used to generate probes for northern and Southern analyses.**

| Genes             | Template  | Fragment (bp) | Oligo  | Oligonucleotide sequence, 5' → 3'       |
|-------------------|-----------|---------------|--------|-----------------------------------------|
| arg-2 (NCU07732)  | cDNA*     | 997           | MB001  | GTTATAGGAATTCGCGCTTCCACCATGCCCATCTCC    |
|                   |           |               | MB002  | CTCTATTCCGCTCGAGTTGTAGCCTTCGGAGGTGAGACC |
| eif5 (NCU00366)   |           | 1278          | oYZ405 | GCTCTAGATCAATACCGCCAAAATGGG             |
|                   |           |               | oYZ406 | GCTTAATTAACTCATCGTCCTCCTCCTCAG          |
| eif4a3 (NCU01234) |           | 1150          | oYZ195 | GATCTAGACAGAATCGCCCACCATG               |
|                   |           |               | oYZ196 | GCTTAATTAAGGAGATAAGGTCGGCAACATTCATGGGC  |
| eRF1 (NCU00410)   |           | 757           | oYZ121 | ACTTCGTCTTCTCATCTTCTTAC                 |
|                   |           |               | oYZ120 | AGGCGTTCAGGTCGTTCTTG                    |
| cox-5 (NCU05457)  |           | 396           | MB005  | GTTATAGGAATTCGCGCTTCCACCATGCCCATCTCC    |
|                   |           |               | MB006  | CTCTATTCCGCTCGAGTTGTAGCCTTCGGAGGTGAGACC |
| luc               | pRMP57    | 663           | oYZ167 | ACATCACCTACGCCGAGTACTTC                 |
|                   |           |               | oYZ188 | TCCTCCTCGAAGCGGTACA                     |
| his-3 (NCU03139)  | cDNA*     | 1761          | oYZ069 | CCACCGTTGTCGTTGATGAG                    |
|                   |           |               | oYZ068 | GAGTAATCGCCAACGGACTCA                   |
| bar               | pBARGP E1 | 300           | oYZ487 | CAACCACTACATCCAGACAAGCA                 |
|                   |           |               | oYZ486 | ACAGCGACCACGCTCTTGA                     |
| mago (NCU04405)   | cDNA*     | 602           | oYZ377 | GCTCTAGAAGCAACAAACAGCCATGTCAGC          |
|                   |           |               | oYZ378 | CCTTAATTAATGAGGCTTGATCTTGAAGTGC         |
| γ14 (NCU03226)    | cDNA*     | 519           | oYZ375 | GCTCTAGAACGTAGAAGCTGCTAAAATG            |
|                   |           |               | oYZ376 | CCTTAATTAACTCGTCCCTGCCAACG              |

\*DNase I treated total RNA was used as template to synthesize first-strand cDNA with a combination of oligo(dT)<sub>18</sub> and random hexamer primers as described in Materials and Methods
