# Supplementary material
Source: PubMed Central journal article supplement (PMC4574236)
Supplement: supp_115.176743_TableS10.pdf [file supp_115.176743_TableS10.pdf]

**Table S10 List of transcripts and oligonucleotide primers used for qPCR.**

| Genes             | Oligo  | Position | Oligonucleotide sequence, 5' → 3' |
|-------------------|--------|----------|-----------------------------------|
| 25S               | oYZ029 | 1794     | CCGCGGGAGGGAATAATT                |
|                   | oYZ030 | 1849     | GGAGACCTGCTGCGGTTATG              |
| luc               | oYZ187 | 787      | ACGGCTTCGGCATGTTCA                |
|                   | oYZ188 | 865      | TCCTCCTCGAAGCGGTACA               |
| upf1 (NCU04242)   | MSS169 | 1284     | CAAGCTGCTGGGACACGAA               |
|                   | MSS170 | 1347     | GTGGAACTTCTTGGGCATCGTA            |
| upf2 (NCU05267)   | oYZ055 | 3514     | CCGGGAGAACGATGATTATGA             |
|                   | oYZ056 | 3578     | GATCGGAGCGGTTATGGTGAT             |
| upf3 (NCU03435)   | oYZ061 | 167      | TCGGCGATGAATGGAAAGTC              |
|                   | oYZ062 | 227      | TTGCCAGGCCAGTATGAAAAC             |
| mago (NCU04405)   | oYZ009 | 260      | AATGGCCGACCAAAAACAAA              |
|                   | oYZ010 | 314      | TTCCCGAGGCGGATCTC                 |
| y14 (NCU03226)    | oYZ299 | 429      | ACAGGCGAAGCGGTTACG                |
|                   | oYZ300 | 485      | CCTCAAGCGTCGGATACTCAA             |
| cbp20 (NCU00210)  | oYZ379 | 450      | TCARGGARCGCRTCTRCGARTTGRC         |
|                   | oYZ380 | 508      | TGARTGCRGCTRCGTRCCARACTRT         |
| cbp80 (NCU04187)  | oYZ459 | 470      | TGGRTGTRCTTRCCRCGTRGTTTG          |
|                   | oYZ460 | 533      | GGARACTRGGCRAGTRCTGRCAARGTC       |
| arg-2 (NCU07732)  | MB019  | 315      | CACCCAGCCCTTGATTGG                |
|                   | MB020  | 373      | GGTTGAACTCGTCACGCTCAT             |
| eif5 (NCU00366)   | oYZ251 | 17       | TCAACGTTTCGTCGGGACAA              |
|                   | oYZ252 | 79       | TGGTCTGGATACGCTCCATCT             |
| inl (NCU06666)    | oYZ271 | 1336     | CTTGCTCGCCCCTGAT                  |
|                   | oYZ272 | 1395     | CTGGATGCGGGTCATGATC               |
| eif4a3 (NCU01234) | oYZ023 | 486      | TCATCTCCGACCAGACACA               |
|                   | oYZ024 | 543      | GAGGAGCTCATCGGCTTCAT              |
| eRF1 (NCU00410)   | oYZ119 | 727      | CGTTGCCGGTCTCGTTTT                |
|                   | oYZ120 | 782      | AGGCGTTCAGGTCGTTCTTG              |
| xrn1(NCU06678)    | oYZ357 | 1454     | AGCRCGTRTCTRCCGRTATRCATRCAA       |
|                   | oYZ358 | 1516     | TCGRGCCRGARGTTTRAAARTCC           |
| cox-5 (NCU05457)  | MSS177 | 402      | GCAAGAGGCTACCAACGAGTTC            |
|                   | MSS178 | 469      | CTTCGGAGGTGAGACCAGTGA             |
| uc-4 (NCU01446)   | MB063  | 91       | GCCGTCAACTTCGACAACGT              |
|                   | MB064  | 156      | AATGCTGAGGAGAGCGATGAG             |
